# Supplementary material for: Eeyarestatin Compounds Selectively Enhance Sec61-Mediated Ca2+ Leakage from the Endoplasmic Reticulum
Source: PubMed Central journal article supplement (PMC6483976; doi:10.1016/j.chembiol.2019.01.010), 2019-04-18
Supplement: mmc1.pdf [file mmc1.pdf]

**Cell Chemical Biology, Volume 26**

**Supplemental Information**

**Eeyarestatin Compounds Selectively Enhance**

**Sec61-Mediated Ca<sup>2+</sup> Leakage**

**from the Endoplasmic Reticulum**

**Igor Gamayun, Sarah O'Keefe, Tillman Pick, Marie-Christine Klein, Duy Nguyen, Craig McKibbin, Michela Piacenti, Helen M. Williams, Sabine L. Flitsch, Roger C. Whitehead, Eileithya Swanton, Volkhard Helms, Stephen High, Richard Zimmermann, and Adolfo Cavalé**

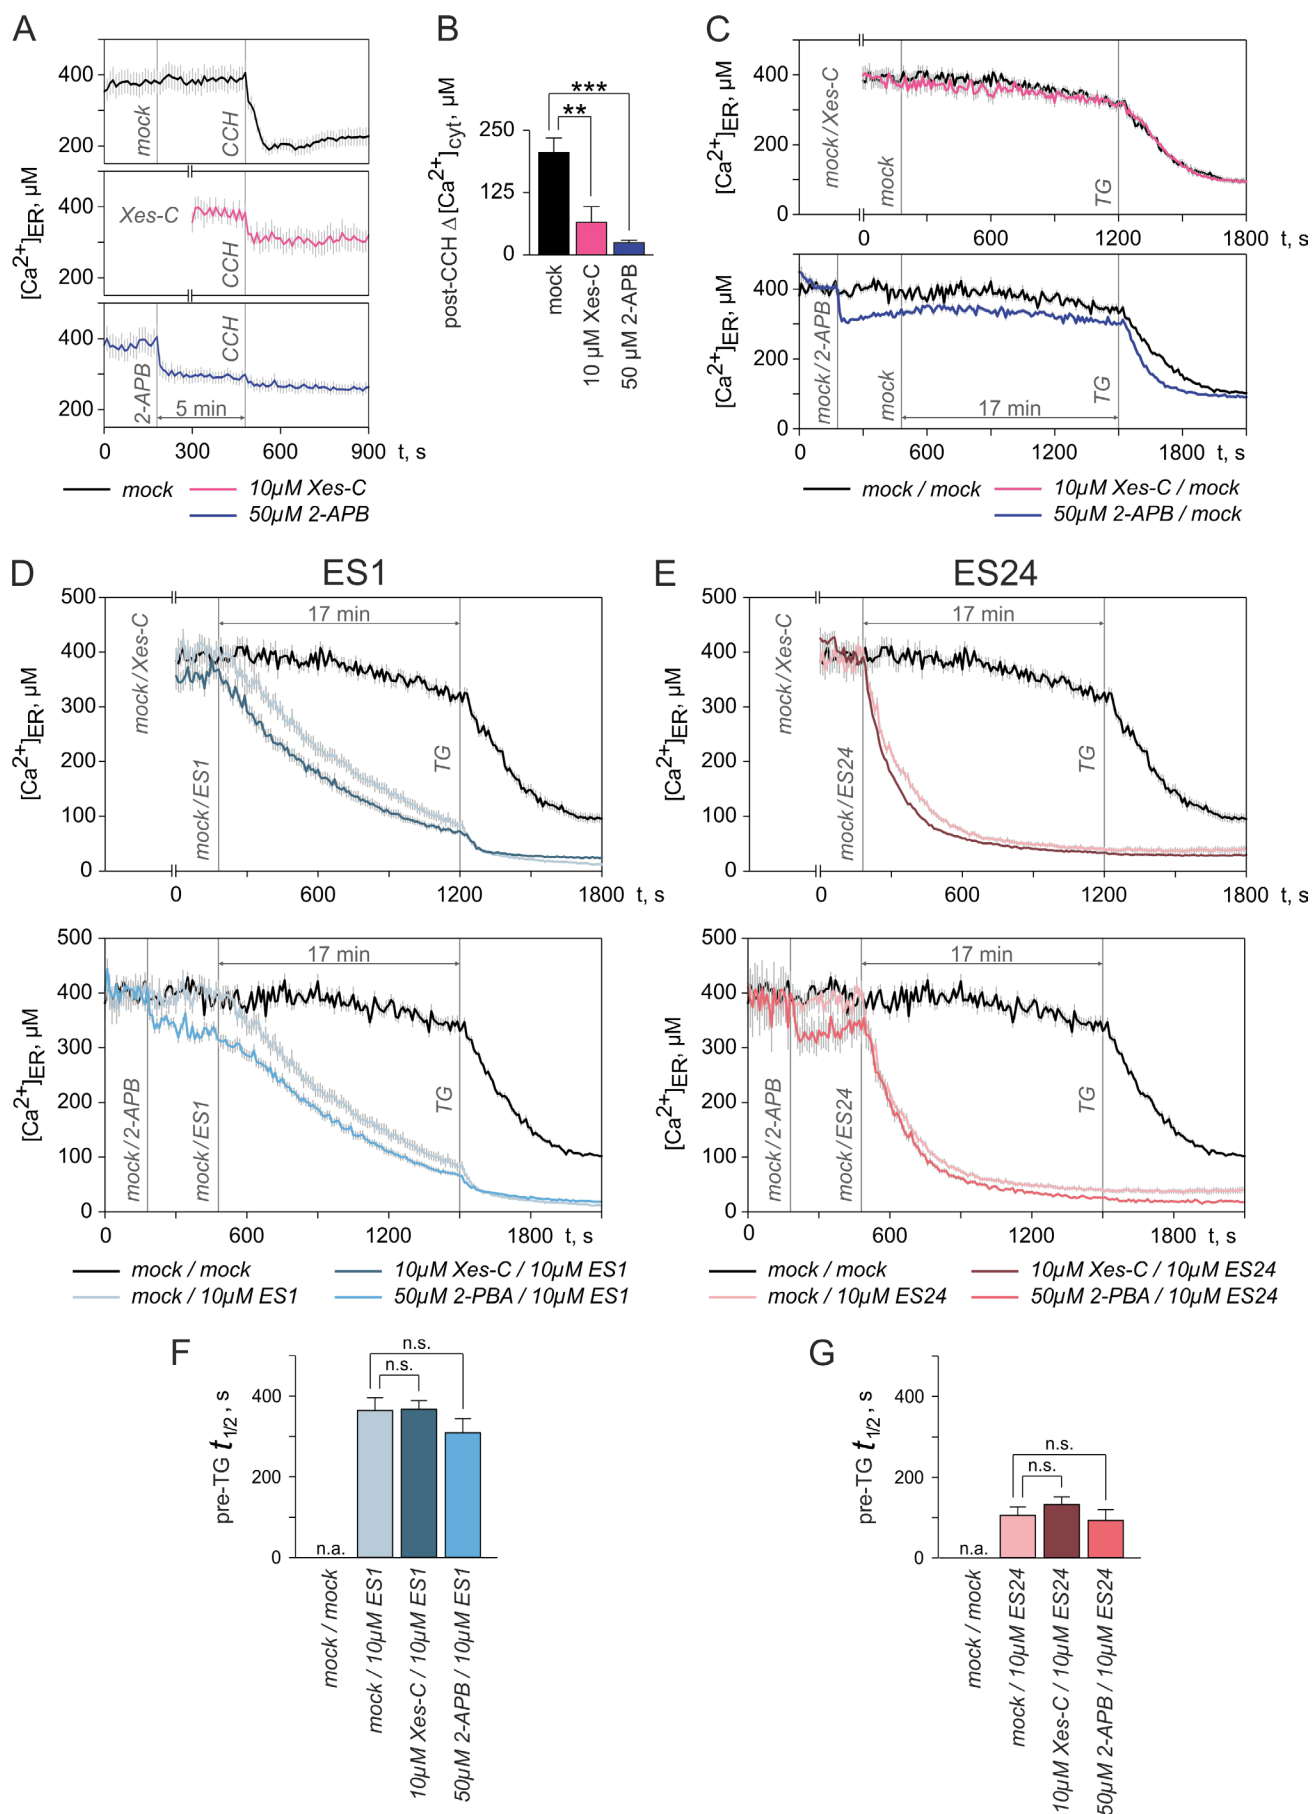

**FIGURE S1 (related to Fig. 1)**

**FIGURE S1 (related to Fig. 1).** Effects of ES1 and ES24 on the  $\text{Ca}^{2+}$  homeostasis under inhibition of  $\text{IP}_3$  receptors.

**(A)** Assessing the inhibition of  $\text{IP}_3$  receptors with 2-aminoethoxydiphenyl borate (2-APB) and xestospongine C (Xes-C) in HEK D1ER cells. The  $\text{Ca}^{2+}$  concentration in ER ( $[\text{Ca}^{2+}]_{\text{ER}}$ ) was measured in the absence of extracellular  $\text{Ca}^{2+}$  (see Methods) and the functionality of the  $\text{IP}_3$  signalling pathway was assessed by applying 1 mM carbachol (CCH). In mock-treated cells, CCH induced a drop in ER  $\text{Ca}^{2+}$ , indicating that the  $\text{IP}_3$  signalling pathway is active in HEK D1ER cells (upper panel). The ER  $\text{Ca}^{2+}$  drop induced by CCH was strongly reduced in cells pre-treated with 10  $\mu\text{M}$  Xes-C for 20 min (middle panel) and almost abolished after exposure to 50  $\mu\text{M}$  2-APB (lower panel).

**(B)** The quantification of decreases in  $[\text{Ca}^{2+}]_{\text{ER}}$  induced by CCH (post-CCH  $\Delta[\text{Ca}^{2+}]_{\text{ER}}$ ) indicates that 50  $\mu\text{M}$  2-APB inhibits  $\text{IP}_3$  receptors stronger than 10  $\mu\text{M}$  Xes-C in HEK D1ER cells.

**(C)** As a control, the protocol used in the experiments shown in Fig. 1B and Fig. 2C was tested in cells treated with Xes-C (10  $\mu\text{M}$  Xes-C / mock) and 2-APB (50  $\mu\text{M}$  2-APB / mock). The time courses of  $[\text{Ca}^{2+}]_{\text{ER}}$  in non-treated cells (mock / mock) and in cells treated with Xes-C were similar (upper panel). Although 2-APB induced a drop in ER  $\text{Ca}^{2+}$ ,  $[\text{Ca}^{2+}]_{\text{ER}}$  remained constant during the recordings (lower panel). As in Fig. 1B and 2C, 1  $\mu\text{M}$  thapsigargin (TG) was applied at the end of recordings.

**(D – E)** Effects of 10  $\mu\text{M}$  ES1 and 10  $\mu\text{M}$  ES24 on  $[\text{Ca}^{2+}]_{\text{ER}}$  under inhibition of  $\text{IP}_3$  receptors with Xes-C and 2-APB. HEK D1ER cells were pre-treated with 10  $\mu\text{M}$  Xes-C for 20 min and, subsequently, ES1 and ES24 were applied (*upper panels*, 10  $\mu\text{M}$  Xes-C / 10  $\mu\text{M}$  ES1, 10  $\mu\text{M}$  Xes-C / 10  $\mu\text{M}$  ES24). The exposure to 2-APB was 5 min long and followed by application of ES1 and ES24 (*lower panels*, 50  $\mu\text{M}$  2-APB / 10  $\mu\text{M}$  ES1, 50  $\mu\text{M}$  2-APB / 10  $\mu\text{M}$  ES24). For comparison, time courses of  $[\text{Ca}^{2+}]_{\text{ER}}$  in control experiments (mock / mock) and the effects of ES1 and ES24 on naïve cells (mock / 10  $\mu\text{M}$  ES1; mock / 10  $\mu\text{M}$  ES24) are shown.

**(F – G)** Comparison of half-times of the  $[\text{Ca}^{2+}]_{\text{ER}}$  decay induced by ES1 and ES24 before TG application (pre-TG  $t_{1/2}$ ) in the experiments shown in D-E.

DMSO controls are denoted as mock. Application time points are indicated by vertical lines in A and C-G. Data is presented as mean  $\pm$  SEM. n.a., not analysed; n.s., non-significant.

\*\* $\text{, } P < 0.01$ ; \*\*\* $\text{, } P < 0.001$ . N: 9-15 cells per experimental setting.

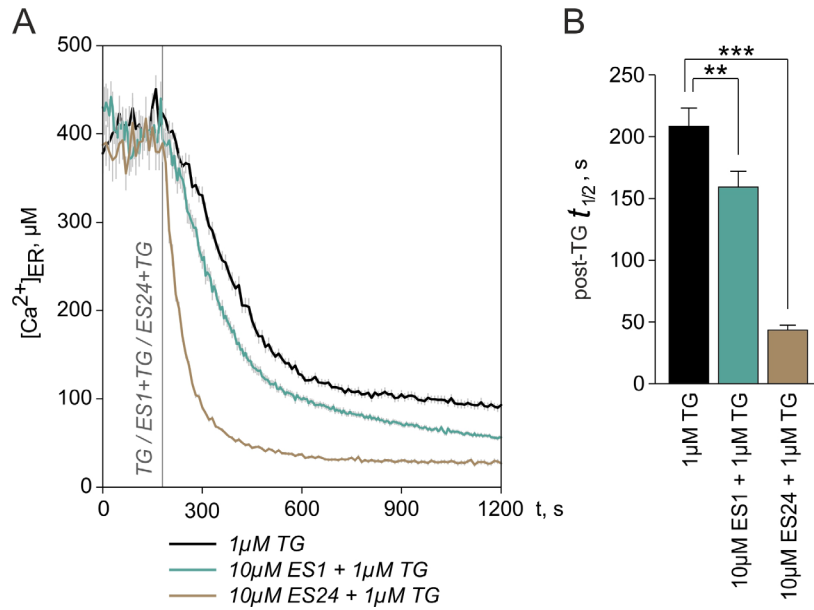

**FIGURE S2 (related to Fig. 2).** ES1 and ES24 accelerate the ER  $Ca^{2+}$  depletion induced by inhibition of SERCA pumps with thapsigargin.

**(A)** The  $Ca^{2+}$  concentration in ER ( $[Ca^{2+}]_{ER}$ ) was measured in HEK D1ER cells in the absence of extracellular  $Ca^{2+}$  (see Methods) and 1  $\mu M$  thapsigargin was applied either alone (TG) or in combination with 10  $\mu M$  ES1 (TG+ES1) and 10  $\mu M$  ES24 (TG+ES24) as indicated. **(B)** Comparison of the half times of decay in  $[Ca^{2+}]_{ER}$  (post-TG  $t_{1/2}$ ) induced by the application of TG, TG+ES1 and TG+ES24 in the experiments shown in A. Data is presented as mean  $\pm$  SEM. \*\*,  $P < 0.01$ ; \*\*\*,  $P < 0.001$ . N: 10-13 cells per experimental setting.

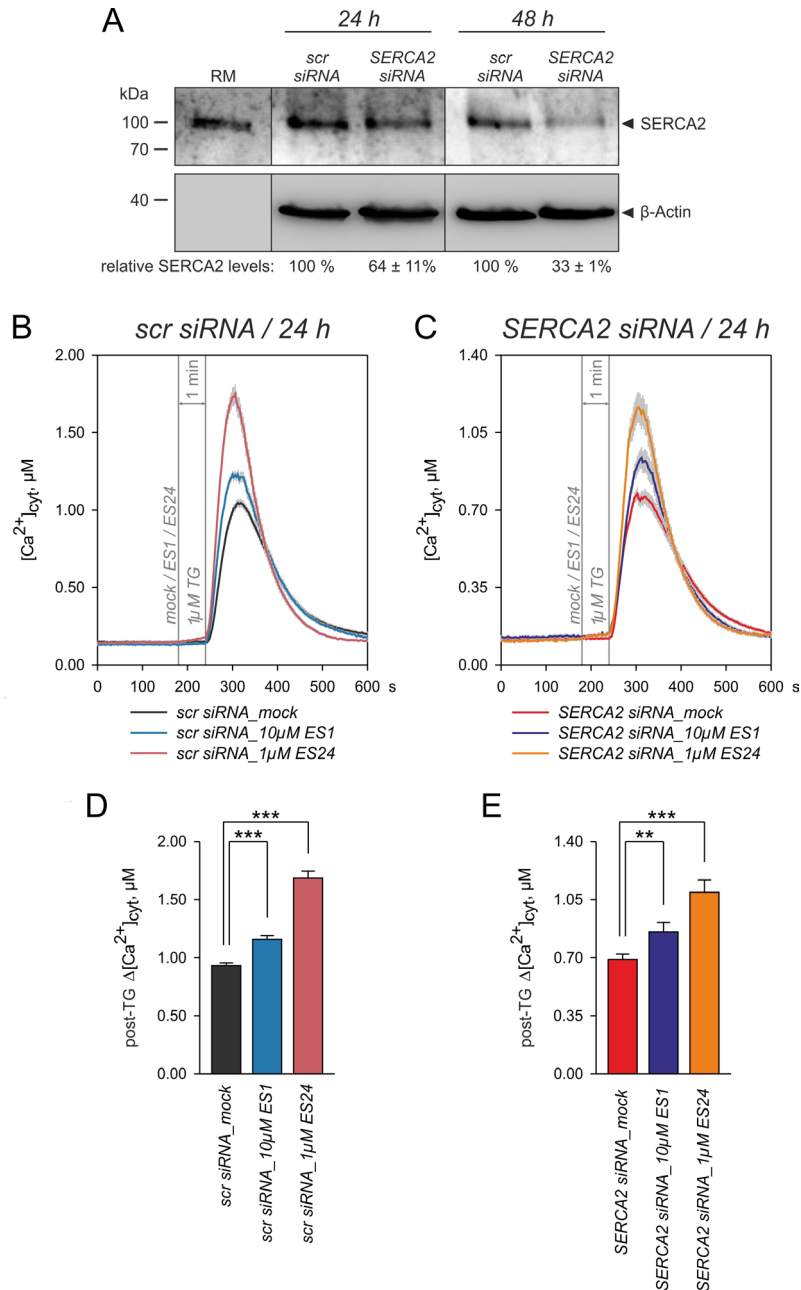

**FIGURE S3 (related to Fig. 3).** Effects of ES1 and ES24 in HeLa cells after knockdown of SERCA pumps.

**(A)** Expression of *SERCA2* in HeLa cells transfected with scramble siRNA (*scr siRNA*) or with siRNA targeting *SERCA2* (*SERCA2 siRNA*). *SERCA2* protein levels were normalized to  $\beta$ -actin and expressed relative to levels in cells transfected with *scr siRNA*. RM, pancreatic rough microsome. Relative *SERCA2* protein levels are given below Western blots.

**(B – C)** Effects of 10  $\mu\text{M}$  ES1 and 1  $\mu\text{M}$  ES24 on HeLa cells transfected with *scr siRNA* or *siRNA SERCA2*, as indicated above graphs.

**(D – E)** Quantification of TG responses (post-TG  $\Delta[\text{Ca}^{2+}]_{\text{cyt}}$ ) measured in experiments shown in B-C.

DMSO controls are denoted as mock. Application time points of ES1, ES24 and TG are indicated by vertical lines in B-C. Data is presented as mean  $\pm$  SD in A and as mean  $\pm$  SEM in B-E. N: 3 blots (A) and 48-63 cells per experimental setting (B-H). \*\*,  $P < 0.01$  and \*\*\*,  $P < 0.001$ .

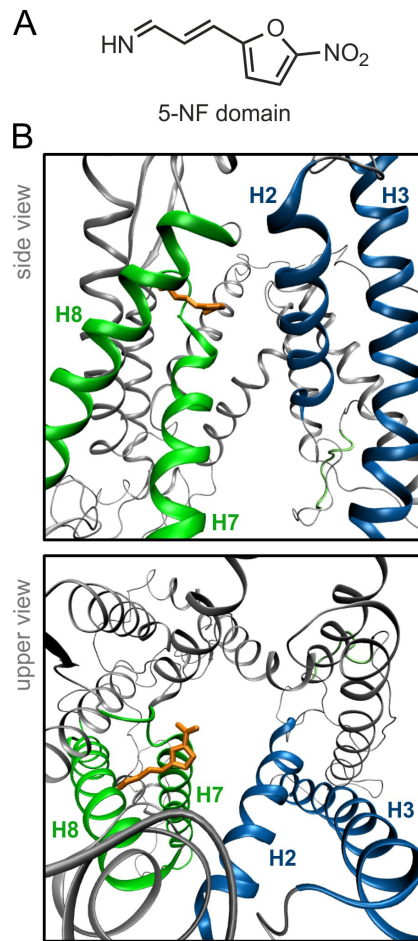

**FIGURE S4 (related to Fig. 6).** Docking of the 5-nitrofur (5-NF) domain to Sec61 $\alpha$ .

**(A)** Chemical structure of the 5-NF domain.

**(B)** Docking of the pure 5-NF domain was analysed using the homology model of human Sec61 $\alpha$ . Shown is the docking position of the 5-NF domain (orange) with best docking score ( $\Delta G = -5.69$  kcal/mol). While this is lower than the docking scores of ES1 and ES24, it is typical that larger molecules achieve larger docking scores. The distance of 5-NF to the H2-H7 gap is 8.65 Å and, thus, slightly shorter than for ES1 (9.98 Å, see Fig. 6) and ES24 (9.87 Å, see Fig. 6). Images show the Sec61 $\alpha$  model seen from the plane of the membrane with the cytosolic side upwards (upper panel) and from the cytosol (lower panel). Lateral gate helices are highlighted in colours (H2 and H3, blue; H7 and H8, green).

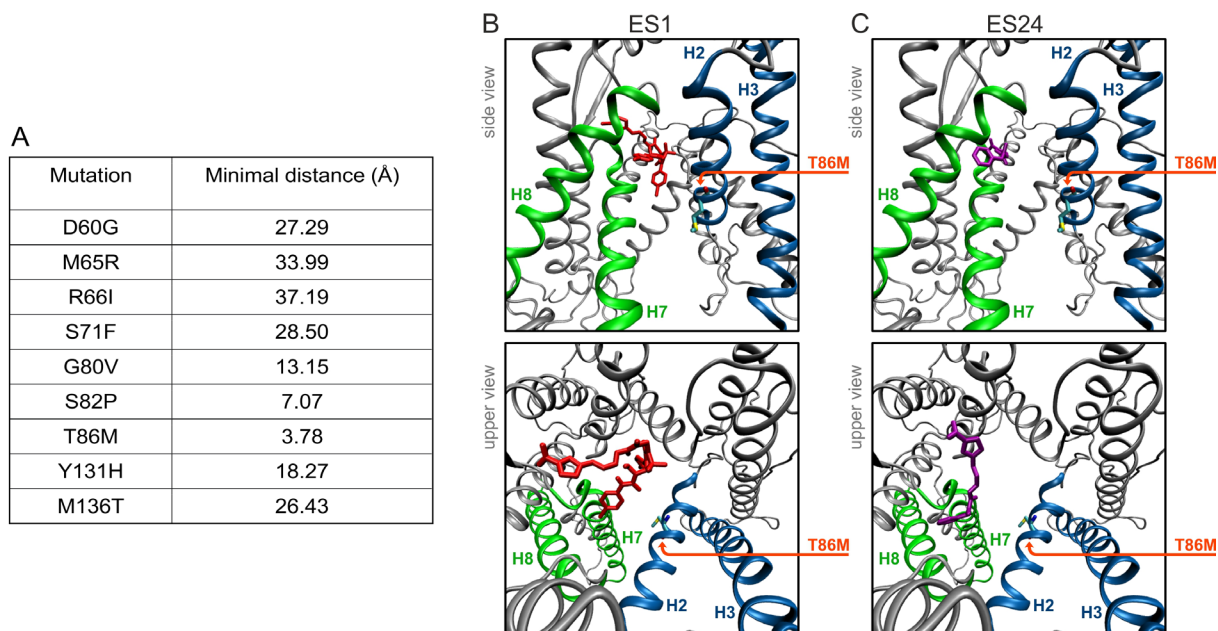

**FIGURE S5 (related to Figure 6).** Docking positions of ES1 and ES24 in the homology model of the human Sec61 $\alpha$  with the mutation T86M.

**(A)** Previously described Sec61 $\alpha$  mutations that confer resistance to various translocation inhibitors (Van Puyenbroeck and Vermiere, 2018) were incorporated in the homology model and minimal distances between mutated amino acids (C-alpha atom positions) and the H2-H7 gap of the lateral gate were measured. Among all these mutants, T86M is closest to the lateral gate. Hence, the mutation T86M was incorporated in the homology Sec61 $\alpha$  model and docking of ES1 and ES24 to the structural model of this mutant was performed.

**(B – C)** Best-scored docking positions of ES1 and ES24 in the model of the T86M Sec61 $\alpha$  mutant. The positions of ES1 and ES24 in the T86M Sec61 $\alpha$  mutant are very similar to the respective docking positions in the model of native Sec61 $\alpha$  (see Fig. 6). The docking scores of ES1 and ES24 in the T86M mutant were slightly lower (ES1,  $\Delta G = -9.39$  kcal/mol; ES24,  $\Delta G = -8.57$  kcal/mol) than in the native Sec61 $\alpha$  (ES1,  $\Delta G = -9.62$  kcal/mol; ES24,  $\Delta G = -9.04$  kcal/mol; see Fig. 6). Images show side views (upper panels) and upper views (lower panels) of the Sec61 $\alpha$  model seen from the plane of the membrane with the cytosolic side upwards and from the cytosol, respectively. The position of T86M is indicated in orange. Lateral gate helices are highlighted in colours (H2 and H3, blue; H7 and H8, green).
