# Supplementary material for: Eeyarestatin Compounds Selectively Enhance Sec61-Mediated Ca2+ Leakage from the Endoplasmic Reticulum
Source: PubMed Central journal article supplement (PMC6483976; doi:10.1016/j.chembiol.2019.01.010), 2019-04-18
Supplement: mmc2.pdf [file mmc2.pdf]

# Cell Chemical Biology

## Eeyarestatin Compounds Selectively Enhance Sec61-Mediated $\text{Ca}^{2+}$ Leakage from the Endoplasmic Reticulum

### Graphical Abstract

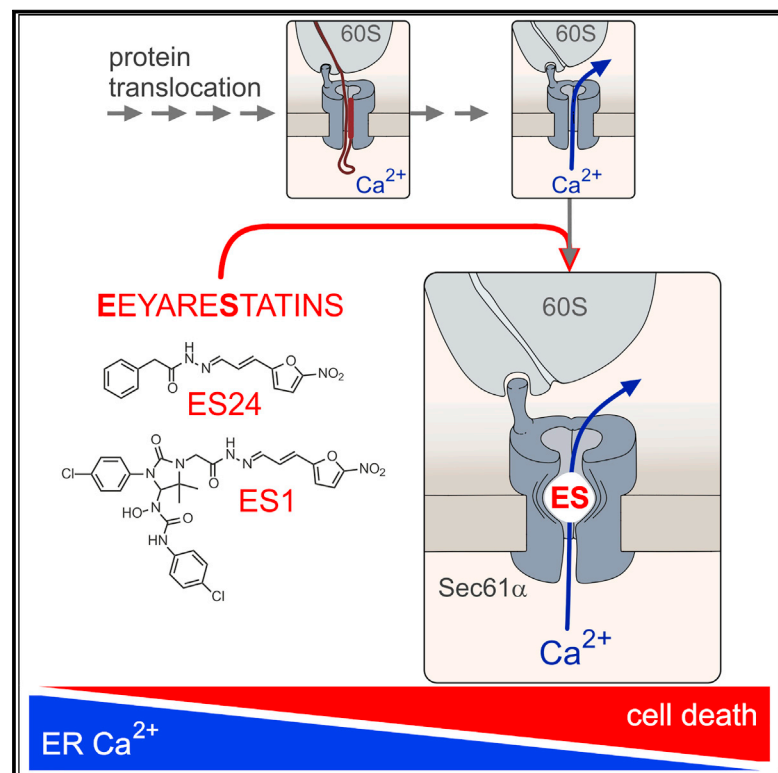

### Authors

Igor Gamayun, Sarah O'Keefe, Tillman Pick, ..., Stephen High, Richard Zimmermann, Adolfo Cavalié

### Correspondence

igor.gamayun@uks.eu (I.G.),  
adolfo.cavalié@uks.eu (A.C.)

### In Brief

Gamayun et al. discovered that eeyarestatins (ESs) interfere with closing mechanisms of Sec61 complexes of the ER and, as a “foot in the door,” stabilize Sec61 complexes in a  $\text{Ca}^{2+}$ -permeable, open state. Specifically, ES24 enhances strongly the Sec61-mediated  $\text{Ca}^{2+}$  leakage from ER and induces  $\text{Ca}^{2+}$ -dependent cell death.

### Highlights

- ES1, ES2, and ES24 deplete  $\text{Ca}^{2+}$  in ER
- ESR35 and ES47 do not affect cellular  $\text{Ca}^{2+}$  homeostasis
- The most potent eeyarestatin, ES24, comprises only the 5-nitrofuranyl domain
- ES1 and ES24 target Sec61 complexes in ER

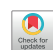

# Eyarestatin Compounds Selectively Enhance Sec61-Mediated $\text{Ca}^{2+}$ Leakage from the Endoplasmic Reticulum

Igor Gamayun,<sup>1,\*</sup> Sarah O'Keefe,<sup>2</sup> Tillman Pick,<sup>1</sup> Marie-Christine Klein,<sup>3</sup> Duy Nguyen,<sup>4</sup> Craig McKibbin,<sup>2,6</sup> Michela Piacenti,<sup>5,7</sup> Helen M. Williams,<sup>5,8</sup> Sabine L. Flitsch,<sup>5</sup> Roger C. Whitehead,<sup>5</sup> Eileithya Swanton,<sup>2</sup> Volkhard Helms,<sup>4</sup> Stephen High,<sup>2</sup> Richard Zimmermann,<sup>3</sup> and Adolfo Cavalié<sup>1,9,\*</sup>

<sup>1</sup>Experimental and Clinical Pharmacology and Toxicology, Saarland University, 66421 Homburg, Germany

<sup>2</sup>School of Biological Sciences, Faculty of Biology, Medicine and Health, University of Manchester, Manchester M13 9PT, UK

<sup>3</sup>Medical Biochemistry and Molecular Biology, Saarland University, 66421 Homburg, Germany

<sup>4</sup>Center for Bioinformatics, Saarland University, 66123 Saarbrücken, Germany

<sup>5</sup>School of Chemistry, University of Manchester, Manchester M13 9PL, UK

<sup>6</sup>Present address: Royal Surrey County Hospital, Egerton Road, Guildford GU2 7XX, UK

<sup>7</sup>Present address: Eli Lilly Italia S.p.A., 50019 Sesto Fiorentino, Italy

<sup>8</sup>Present address: Unilever Research and Development, Port Sunlight, Bebington, Wirral CH63 3JW, UK

<sup>9</sup>Lead Contact

\*Correspondence: igor.gamayun@uks.eu (I.G.), adolfo.cavalié@uks.eu (A.C.)

<https://doi.org/10.1016/j.chembiol.2019.01.010>

## SUMMARY

Eyarestatin 1 (ES1) inhibits p97-dependent protein degradation, Sec61-dependent protein translocation into the endoplasmic reticulum (ER), and vesicular transport within the endomembrane system. Here, we show that ES1 impairs  $\text{Ca}^{2+}$  homeostasis by enhancing the  $\text{Ca}^{2+}$  leakage from mammalian ER. A comparison of various ES1 analogs suggested that the 5-nitrofuranyl (5-NF) ring of ES1 is crucial for this effect. Accordingly, the analog ES24, which conserves the 5-NF domain of ES1, selectively inhibited protein translocation into the ER, displayed the highest potency on ER  $\text{Ca}^{2+}$  leakage of ES1 analogs studied and induced  $\text{Ca}^{2+}$ -dependent cell death. Using small interfering RNA-mediated knockdown of Sec61 $\alpha$ , we identified Sec61 complexes as the targets that mediate the gain of  $\text{Ca}^{2+}$  leakage induced by ES1 and ES24. By interacting with the lateral gate of Sec61 $\alpha$ , ES1 and ES24 likely capture Sec61 complexes in a  $\text{Ca}^{2+}$ -permeable, open state, in which Sec61 complexes allow  $\text{Ca}^{2+}$  leakage but are translocation incompetent.

## INTRODUCTION

The endoplasmic reticulum (ER) is the intracellular organelle in which most secretory and many transmembrane proteins are folded and assembled in eukaryotic cells (Cross et al., 2009b; Lang et al., 2017; Rapoport et al., 2017). Early studies revealed that this organelle also stores  $\text{Ca}^{2+}$  in an ATP-dependent manner (Carreras-Sureda et al., 2018). It is now widely accepted that the ER represents the major intracellular  $\text{Ca}^{2+}$  reservoir and, thus, it

is essential for both protein biogenesis and intracellular  $\text{Ca}^{2+}$  signaling in the mammalian cell. Generally, the total  $\text{Ca}^{2+}$  stored in ER are in the order of 1–3 mM and the luminal free  $\text{Ca}^{2+}$  concentration in ER ( $[\text{Ca}^{2+}]_{\text{ER}}$ ) can reach 100–800  $\mu\text{M}$ , which represents more than 1,000-fold of the cytosolic  $\text{Ca}^{2+}$  concentration ( $[\text{Ca}^{2+}]_{\text{cyt}}$ ) at rest (Carreras-Sureda et al., 2018). However, the ER membrane is significantly more leaky than other cell membranes (Le Gall et al., 2004). Hence  $\text{Ca}^{2+}$ , among other cations, permeates the ER membrane and gives rise to  $\text{Ca}^{2+}$  leakage from ER as a result of the steep ER-cytosol  $\text{Ca}^{2+}$  gradient (Camello et al., 2002). Since ER  $\text{Ca}^{2+}$  leakage can be unmasked by inhibiting sarco/ER  $\text{Ca}^{2+}$  ATPases (SERCA) in multiple cell types, it is generally assumed that  $[\text{Ca}^{2+}]_{\text{ER}}$  is maintained by balancing ER  $\text{Ca}^{2+}$  leakage and ATP-dependent  $\text{Ca}^{2+}$  influx into the ER via SERCA pumps (Camello et al., 2002; Carreras-Sureda et al., 2018). The molecular structure of  $\text{Ca}^{2+}$  leak channels in the ER has not yet been fully elucidated (Camello et al., 2002), but it is remarkable that the ubiquitously expressed Sec61 complex has been identified as a high-conductance  $\text{Ca}^{2+}$ -permeable channel that can support  $\text{Ca}^{2+}$  leakage from the ER (Simon and Blobel, 1991; Lomax et al., 2002; Wirth et al., 2003; Van Coppenolle et al., 2004; Erdmann et al., 2011). The core of the Sec61 complex consists of Sec61 $\alpha$ , Sec61 $\beta$ , and Sec61 $\gamma$ , where Sec61 $\alpha$  forms a protein-conducting channel that facilitates the translocation of secretory and transmembrane proteins into the ER (Lang et al., 2017). Apparently, Sec61 complexes become  $\text{Ca}^{2+}$  permeable only after protein translocation and the resulting Sec61-mediated  $\text{Ca}^{2+}$  leakage is limited by cytosolic  $\text{Ca}^{2+}$ -calmodulin and the ER luminal chaperone immunoglobulin heavy-chain binding protein under physiological conditions (Erdmann et al., 2011; Schäuble et al., 2012). Given the ubiquitous expression of Sec61 complexes in eukaryotic cells, Sec61-mediated  $\text{Ca}^{2+}$  leakage is emerging as an important pharmacological target within the field of  $\text{Ca}^{2+}$  homeostasis. However, little is known about small molecules that modulate ER  $\text{Ca}^{2+}$  leakage by targeting Sec61 complexes. For instance,

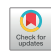

puromycin enhances the Sec61-mediated  $\text{Ca}^{2+}$  leakage (Lomax et al., 2002; Van Coppenolle et al., 2004; Lang et al., 2011a), but, mechanistically, puromycin is a substrate for the ribosomal peptidyltransferase and clears nascent polypeptide chains from protein-conducting channels in the ER membrane (Simon and Blobel, 1991). Some inhibitors of protein translocation across the ER membrane bind directly to the Sec61 complex and stabilize it in a closed state (van Puyenbroeck and Vermeire, 2018). With the exception of exotoxin A (Schäuble et al., 2014), however, it is not known whether Sec61 complexes that have been blocked by translocation inhibitors become permeable or are sealed for  $\text{Ca}^{2+}$  fluxes.

Eeyarestatin 1 and eeyarestatin 2 (ES1 and ES2) are small molecules that were initially identified as inhibitors of protein dislocation from ER into the cytosol (Fiebiger et al., 2004). Subsequent studies have shown that ES1 is an inhibitor of ER-associated protein degradation (ERAD), which targets the cytosolic AAA-ATPase p97, leading to the accumulation of poly-ubiquitinated ERAD substrates (Wang et al., 2008, 2010). Supporting this idea, it has been shown that ES1 is particularly cytotoxic against cancer cells when combined with proteasome inhibitors (Wang et al., 2009; Auner et al., 2013). Additional mechanisms that potentially contribute to the cytotoxic effects of ES1 are the impairment of both intracellular vesicular transport and membrane insertion of tail-anchored proteins (Aletrari et al., 2011; Naydenov et al., 2012; Figueiredo Costa et al., 2018). Independently of targeting the ER-cytosol dislocation of proteins, ES1 also inhibits the co-translational translocation of nascent polypeptides into the ER, most likely by inhibiting Sec61 complexes both *in cellula* and *in vitro* (Cross et al., 2009a). The ES1-dependent inhibition of protein translocation at the ER leads to an almost complete loss of glycoprotein secretion (Cross et al., 2009a) and, after ~2 h of exposure to ES1, cells also begin to show signs of ER stress in the form of the unfolded protein response (McKibbin et al., 2012). Thus, ES1 apparently affects ER functions at various levels, including co-translational protein translocation through Sec61 complexes (Cross et al., 2009a) and, since Sec61 complexes support  $\text{Ca}^{2+}$  fluxes through ER membranes (Lang et al., 2017), it can be predicted that ES1 treatment of cells will also impact on ER  $\text{Ca}^{2+}$  homeostasis. However, whether the ES1-mediated blockade of co-translational translocation is accompanied by the opening or closing of Sec61 complexes to  $\text{Ca}^{2+}$  ions is unknown. To distinguish between these two possibilities, we monitored the effects of ES1 by imaging both  $[\text{Ca}^{2+}]_{\text{cyt}}$  and  $[\text{Ca}^{2+}]_{\text{ER}}$ . Surprisingly, we found that ES1 enhanced ER  $\text{Ca}^{2+}$  leakage and depleted the ER  $\text{Ca}^{2+}$  store. Using *SEC61A1* gene silencing, we show that ES1 increases  $\text{Ca}^{2+}$  leakage from ER by targeting Sec61 complexes. By comparing the actions of different ES1 analogs on both protein translocation and  $\text{Ca}^{2+}$  homeostasis, we pinpointed the structural domain responsible for the effects of ES1 on Sec61 complexes. Hence, ES24, which resembles the 5-NF domain of ES1 and blocks protein translocation *in vitro*, is more effective than the parent compound at enhancing Sec61-mediated  $\text{Ca}^{2+}$  leakage and is particularly cytotoxic to cells that are sensitive to  $\text{Ca}^{2+}$ -induced cell death. Conversely, the effects of ES24 on cellular ubiquitin homeostasis, and hence its likely impact on protein degradation, are less pronounced than those of ES1. On the basis of these findings, we propose that ES24 and the

5-NF domain of ES1 interact with the lateral gate as a “foot in the door” and capture Sec61 channels in a  $\text{Ca}^{2+}$ -permeable, open state that is translocation incompetent.

## RESULTS

### ES1 Depletes ER $\text{Ca}^{2+}$ by Enhancing $\text{Ca}^{2+}$ Leakage from ER

To obtain an integrated view of the  $\text{Ca}^{2+}$  status in cells under treatment with ES1, we measured free  $\text{Ca}^{2+}$  concentrations simultaneously in the ER ( $[\text{Ca}^{2+}]_{\text{ER}}$ ) and the cytosol ( $[\text{Ca}^{2+}]_{\text{cyt}}$ ) in the absence of extracellular  $\text{Ca}^{2+}$  to minimize  $\text{Ca}^{2+}$  entry.  $[\text{Ca}^{2+}]_{\text{ER}}$  was imaged with the genetically encoded, FRET-based  $\text{Ca}^{2+}$  sensor D1ER (Palmer et al., 2004), which was stably expressed in HEK cells (HEK-D1ER). FURA-2 was used to image  $[\text{Ca}^{2+}]_{\text{cyt}}$  in the same HEK D1ER cells. To minimize possible secondary effects, such as those resulting from a prolonged ER stress (see McKibbin et al., 2012), cellular  $\text{Ca}^{2+}$  levels were analyzed within minutes of ES1 addition in the so-called “online” protocol (Figure 1). In this approach, we first explored the action of ES1 on  $[\text{Ca}^{2+}]_{\text{cyt}}$  and  $[\text{Ca}^{2+}]_{\text{ER}}$ . Afterward, we unmasked  $\text{Ca}^{2+}$  leakage from the ER by blocking SERCA pumps with thapsigargin (TG) and measured the specific effects of ES1 on  $\text{Ca}^{2+}$  leakage from the ER.

As shown in Figure 1A, we observed an increase of  $[\text{Ca}^{2+}]_{\text{cyt}}$  immediately after application of ES1. Since we minimized extracellular  $\text{Ca}^{2+}$  entry by using EGTA in the bath solution, the increase of  $[\text{Ca}^{2+}]_{\text{cyt}}$  induced by ES1 could in principle have resulted from the outflow of  $\text{Ca}^{2+}$  from intracellular  $\text{Ca}^{2+}$  stores. It is conceivable that ES1 potentiated the accumulation of ER  $\text{Ca}^{2+}$  in cytosol by also inhibiting cellular clearance mechanisms. However, all cells treated with 0.1 and 1  $\mu\text{M}$  ES1 successfully removed the large amounts of  $\text{Ca}^{2+}$  that were released by TG into the cytosol (Figure 1A). Based on these observations, we suggest that ES1 does not disturb the clearance of  $\text{Ca}^{2+}$  from the cytosol, at least during the 17-min exposure to the compound. In addition, the fact that TG was largely ineffective after treatment with 10  $\mu\text{M}$  ES1 (Figure 1A) underpinned the suggestion that ES1 primarily mobilizes  $\text{Ca}^{2+}$  from TG-sensitive  $\text{Ca}^{2+}$  stores. This suggestion is further supported by the analysis of  $[\text{Ca}^{2+}]_{\text{ER}}$  that was measured simultaneously in the same set of cells (Figure 1B). The loss of ER  $\text{Ca}^{2+}$  due to EGTA in the bath solution was relatively low before TG application (~0.75% per min). By contrast,  $[\text{Ca}^{2+}]_{\text{ER}}$  began to decrease immediately after application of 1–10  $\mu\text{M}$  ES1 (Figure 1B). Thus, the  $[\text{Ca}^{2+}]_{\text{ER}}$  imaging experiments strongly suggest that ES1 specifically impaired ER  $\text{Ca}^{2+}$  homeostasis in a dose-dependent manner. The possible involvement of  $\text{IP}_3$  receptors in the effects of ES1 is unlikely because the decrease of  $[\text{Ca}^{2+}]_{\text{ER}}$  was also observed in the presence of  $\text{IP}_3$  inhibitors (Figure S1). One possible explanation for this effect is that ES1 might have inhibited SERCA pumps. A second, not necessarily exclusive, explanation is that ES1 might have enhanced  $\text{Ca}^{2+}$  leakage from the ER. We therefore inhibited SERCA pumps with TG in order to determine the specific effects of ES1 on  $\text{Ca}^{2+}$  leakage and found that ES1 apparently enhanced the  $\text{Ca}^{2+}$  leakage rate such that the TG-induced decay of  $[\text{Ca}^{2+}]_{\text{ER}}$  became faster as the ES1 concentration was increased from 0.1 to 1  $\mu\text{M}$ , suggesting that ES1 induced a dose-dependent gain of  $\text{Ca}^{2+}$  leakage (Figure 1B).

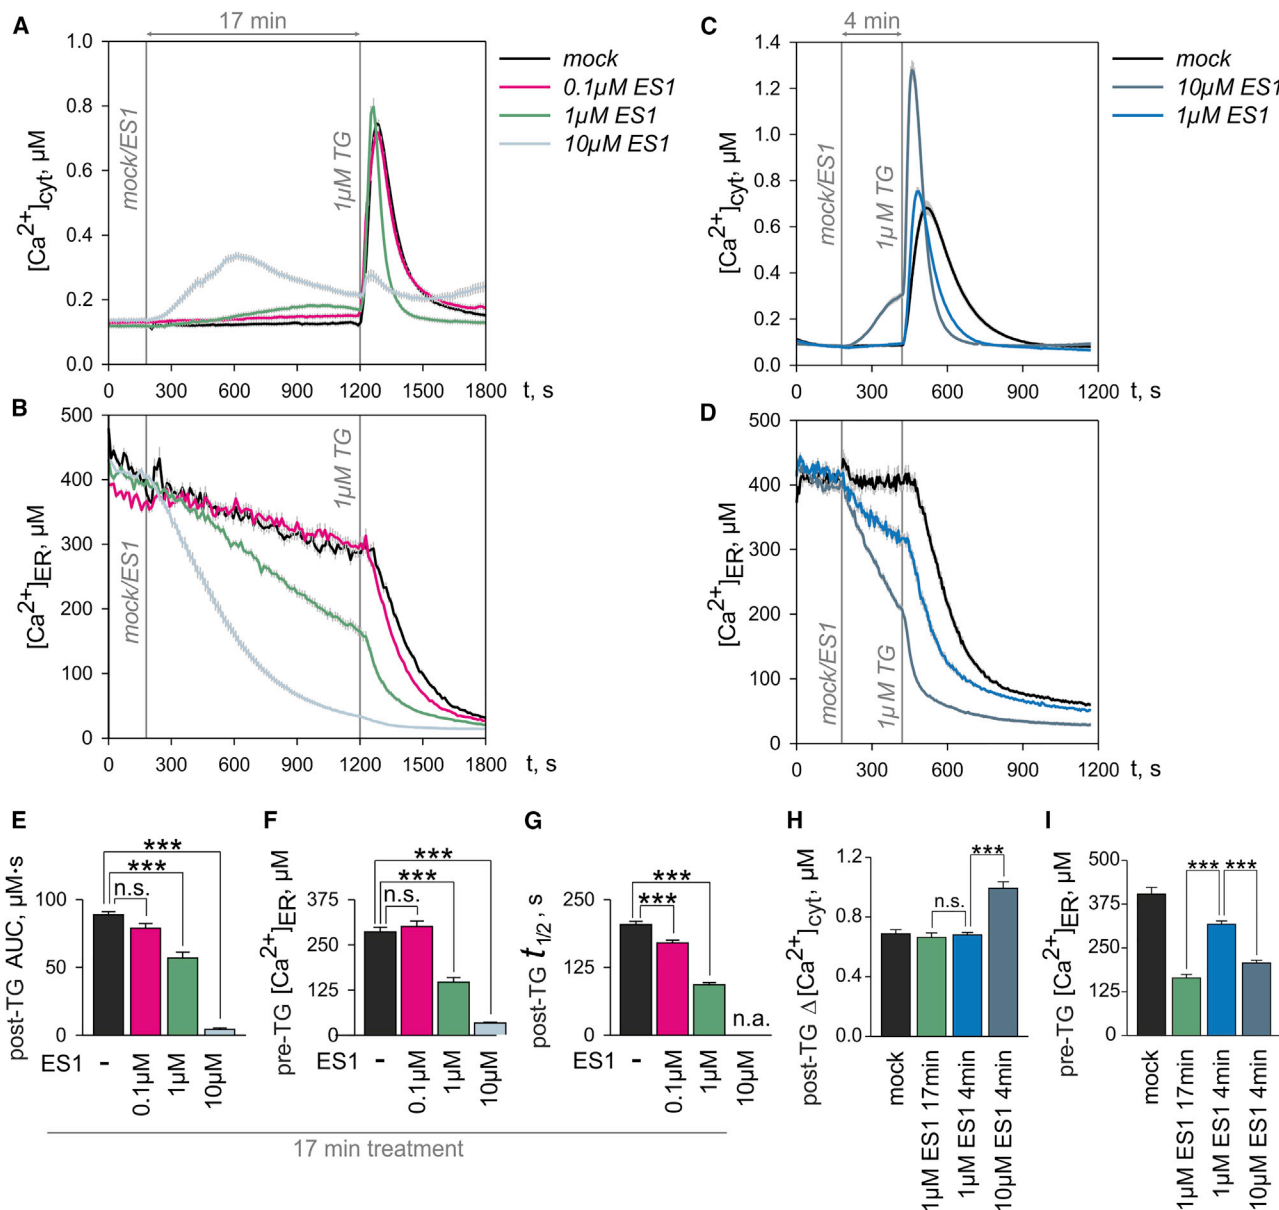

**Figure 1. Eeyarestatin 1 (ES1) Interferes with the Cell  $\text{Ca}^{2+}$  Homeostasis by Enhancing the  $\text{Ca}^{2+}$  Leakage from ER in a Dose- and Time-Dependent Manner**

(A and B) Increasing concentrations of ES1 produced accumulation of  $\text{Ca}^{2+}$  in cytosol (A), which resulted from the loss of ER (B)  $\text{Ca}^{2+}$  due to the dose-dependent gain of  $\text{Ca}^{2+}$  leakage.

(C and D) The TG responses in cytosolic  $\text{Ca}^{2+}$  (C) after short exposures to ES1 reflected the dose-dependent decrease of ER  $\text{Ca}^{2+}$  (D) and the gain of  $\text{Ca}^{2+}$  leakage.

(E) Surges in  $[\text{Ca}^{2+}]_{\text{cyt}}$  after TG application were integrated between 1,200 and 1,800 s to obtain the area under the curve (post-TG AUC) for the experiments shown in (A).

(F) Decreases of  $[\text{Ca}^{2+}]_{\text{ER}}$  induced by ES1 in experiments shown in (B) were quantified just before TG application (pre-TG  $[\text{Ca}^{2+}]_{\text{ER}}$ ).

(G) The  $\text{Ca}^{2+}$  leakage from ER was estimated by measuring the half-time of the decay in  $[\text{Ca}^{2+}]_{\text{ER}}$  (post-TG  $t_{1/2}$ ) induced by TG in experiments shown in (B).

(H and I) The relative amplitude of  $[\text{Ca}^{2+}]_{\text{cyt}}$  increases after TG applications (post-TG  $\Delta[\text{Ca}^{2+}]_{\text{cyt}}$ ) (H) and  $[\text{Ca}^{2+}]_{\text{ER}}$  levels just before TG application (pre-TG  $[\text{Ca}^{2+}]_{\text{ER}}$ ) (I) are shown for the experiments in (C and D).

DMSO controls are denoted as mock. Application time points are indicated by vertical lines in (A–D) (mock/ES1; 1  $\mu\text{M}$  TG). Data are presented as means  $\pm$  SEM. n.a., not analyzed; n.s., not significant; \*\*\* $p < 0.001$ .  $N = 30$ –47 cells per experimental setting. See also Figure S1.

When the ER  $\text{Ca}^{2+}$ -efflux-influx equilibrium was broken down by TG, the  $[\text{Ca}^{2+}]_{\text{ER}}$  decay displayed a typical exponential time course (Figure 1B), as reported previously (e.g., Means et al.,

2006). Accordingly, the amount of  $\text{Ca}^{2+}$  running out per unit time, here termed  $\text{Ca}^{2+}$  leakage, is proportional to the product of  $[\text{Ca}^{2+}]_{\text{ER}}$  and the  $\text{Ca}^{2+}$  leak constant, which in turn reflects

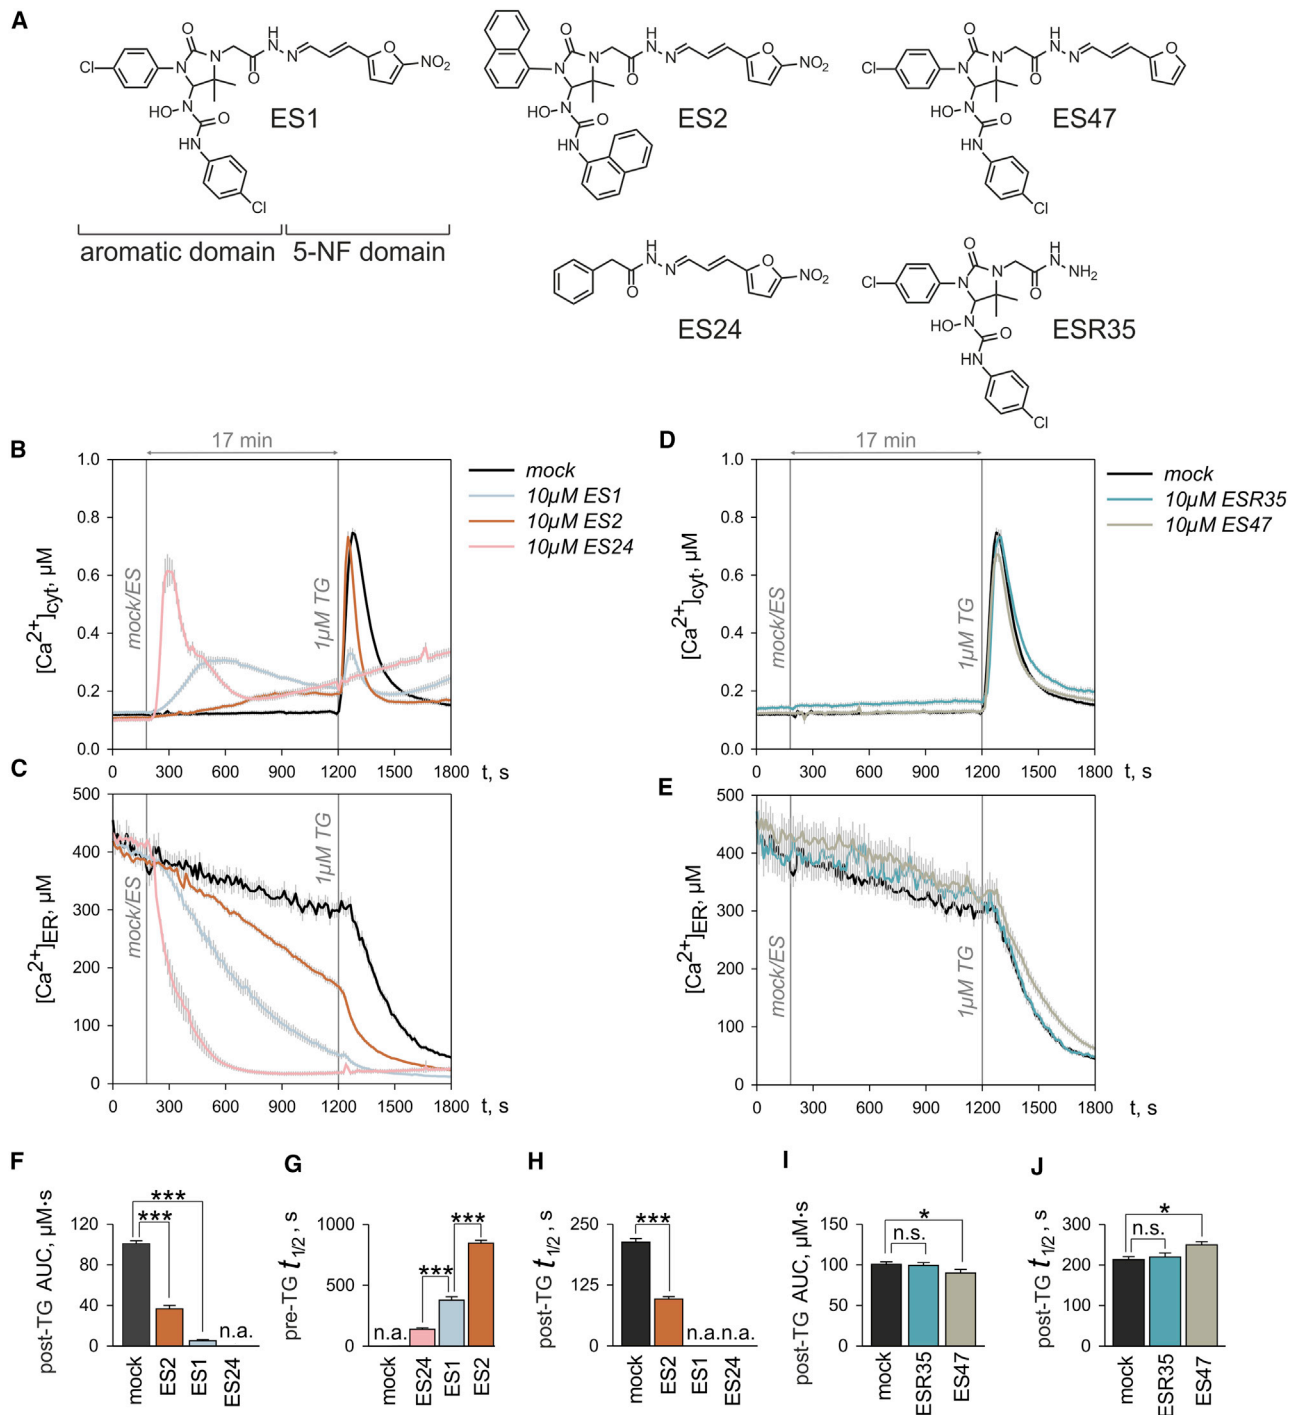

**Figure 2. Comparison of the Effects of ES1 and Its Analogs ES2, ES24, ESR35, and ES47 on Cell Ca<sup>2+</sup> Homeostasis**

(A) ES1 comprises an aromatic-rich domain and a domain that contains a 5-nitrofuran (5-NF) group. The ES1 analogs carry chemical modifications either in the aromatic domain (ES2, ES24) or in the 5-NF domain (ESR35, ES47).

(B and C) The effects of ES2 on cytosolic (B) and ER (C) Ca<sup>2+</sup> were mild compared with those of ES1, while ES24 rapidly depleted ER Ca<sup>2+</sup> producing a robust accumulation of Ca<sup>2+</sup> in cytosol.

(D and E) ESR35 was ineffective at all and ES47 produced minute effects on cytosolic (D) and ER (E) Ca<sup>2+</sup>.

(F) The area under the curve for TG responses shown in (A) were measured by integrating time courses of [Ca<sup>2+</sup>]<sub>cyt</sub> between 1,200 and 1,800 s (post-TG AUC).

(G and H) Half-times were determined for [Ca<sup>2+</sup>]<sub>ER</sub> decays (G) after application of ES1, ES2, and ES24 (pre-TG t<sub>1/2</sub>) and (H) after the subsequent TG application in experiments shown in (C) (post-TG t<sub>1/2</sub>).

(legend continued on next page)

the fraction of  $[Ca^{2+}]_{ER}$  released per unit time and is directly related to half-time of decay ( $t_{1/2}$ ), i.e., the time required for  $[Ca^{2+}]_{ER}$  to decrease by 50% of the pre-TG level. Since the TG-induced changes in  $[Ca^{2+}]_{cyt}$  likely reflect the  $Ca^{2+}$  leakage, it is expected that a time-dependent decrease of  $[Ca^{2+}]_{ER}$  due to enhanced  $Ca^{2+}$  leakage will paradoxically reduce cytosolic responses to TG, as is observed for 10  $\mu$ M ES1 in Figure 1A. Therefore, we next analyzed the time-dependent effects of ES1 on  $[Ca^{2+}]_{cyt}$  and  $[Ca^{2+}]_{ER}$ . Despite the lower  $[Ca^{2+}]_{ER}$  levels, the cytosolic responses to TG were higher in cells treated with 10  $\mu$ M ES1 for 4 min than in those treated with 1  $\mu$ M ES1 (Figure 1C). In 4-min treatments, however, the  $[Ca^{2+}]_{ER}$  levels decayed to lower levels in cells exposed to 10  $\mu$ M ES1 than in those treated with 1  $\mu$ M ES1 (Figure 1D). The most likely explanation for these apparently contradictory results is that 10  $\mu$ M ES1 enhanced the  $Ca^{2+}$  leakage sufficiently strongly to compensate for the reduced  $[Ca^{2+}]_{ER}$  levels, thus giving rise to stronger cytosolic responses to TG. In fact,  $t_{1/2}$  of the TG-induced decay of  $[Ca^{2+}]_{ER}$  was  $106.61 \pm 7.72$  and  $43.83 \pm 2.18$  s in cells treated for 4 min with 1 and 10  $\mu$ M ES1, respectively. Next, we compared the effects of 4- and 17-min exposure with 1  $\mu$ M ES1. Since  $[Ca^{2+}]_{ER}$  decreased continuously during ES1 exposures, the  $[Ca^{2+}]_{ER}$  levels were significantly lower after a 17-min exposure than after a 4-min exposure to 1  $\mu$ M ES1 (Figures 1B and 1D). Surprisingly, however, the cytosolic responses to TG were similar after 4- and 17-min treatments with 1  $\mu$ M ES1 (Figures 1A and 1C). Based on the idea that the product of  $[Ca^{2+}]_{ER}$  and  $Ca^{2+}$  leakage constant determines the amplitude of cytosolic responses to TG, the most likely explanation for the different responses at 4 and 17 min is that the gain of  $Ca^{2+}$  leakage was high enough to support a robust response to TG in cytosol at the end of the 17-min ES1 treatment. In fact,  $t_{1/2}$  of the TG-induced decay of  $[Ca^{2+}]_{ER}$  was  $106.61 \pm 7.72$  and  $94.20 \pm 6.50$  s after 4- and 17-min treatments with 1  $\mu$ M ES1, respectively. Thus, the experiments in Figures 1C and 1D indicate that ES1 begins to enhance the  $Ca^{2+}$  leakage from ER almost immediately after application and this effect is boosted during the treatment in a time-dependent manner.

A quantitative analysis of the  $Ca^{2+}$  imaging data revealed the dose-dependence of ES1 effects at the level of cytosolic  $Ca^{2+}$  and ER  $Ca^{2+}$ . The area under the  $[Ca^{2+}]_{cyt}$  surge induced by TG (post-TG area under the curve [AUC]), the  $[Ca^{2+}]_{ER}$  levels before TG application (pre-TG  $[Ca^{2+}]_{ER}$ ) and the half-times of the TG-induced decay in  $[Ca^{2+}]_{ER}$  (post-TG  $t_{1/2}$ ) exhibited a strong dependence on ES1 concentrations in the 17-min treatments (Figures 1E–1G). Specifically, post-TG  $t_{1/2}$  showed the dose-dependent gain of  $Ca^{2+}$  leakage induced by ES1 (Figure 1G). Based on the analysis of post-TG AUC, pre-TG  $[Ca^{2+}]_{ER}$  and post-TG  $t_{1/2}$ , it can be estimated that the half maximal effective concentration ( $EC_{50}$ ) for the effects of ES1 on cytosolic and ER  $Ca^{2+}$  is approximately 1  $\mu$ M (Figures 1E–1G). The low post-TG AUC values in the presence of 1  $\mu$ M ES1 (Figure 1E) reflected mainly the shortening of the whole TG response (Figure 1A), which in turn paralleled the decrease

of  $[Ca^{2+}]_{ER}$  (Figure 1F) and the increase of the  $Ca^{2+}$  leak constant, seen as a shortening of post-TG  $t_{1/2}$  (Figure 1G). Thus, ES1 affects the product of  $[Ca^{2+}]_{ER}$  and  $Ca^{2+}$  leak constant, i.e., the  $Ca^{2+}$  leakage. Following this reasoning, the time-dependent ES1 effects on  $Ca^{2+}$  leakage can be appreciated by comparing 4- and 17-min treatments. Cytosolic TG responses displayed similar amplitudes (post-TG  $\Delta[Ca^{2+}]_{cyt}$ ) after 4- and 17-min treatments with 1  $\mu$ M ES1 (Figure 1H) despite lower  $[Ca^{2+}]_{ER}$  levels after 17-min exposures (Figure 1I) because the  $Ca^{2+}$  leak constant increased with time, i.e., post-TG  $t_{1/2}$  values decreased ( $106.61 \pm 7.72$  versus  $94.20 \pm 6.50$  s for 4- and 17-min treatments with 1  $\mu$ M ES1, respectively).

### Differential Effect of ES1 Analogs on ER $Ca^{2+}$

ES1 comprises two structural and functional distinct domains (Figure 2A): a 5-NF-containing domain and an aromatic domain (Wang et al., 2010; Aletrari et al., 2011; McKibbin et al., 2012). In our present study, we have used the closely related analog ES2 and compounds ES24, ESR35, and ES47 (Figure 2A), collectively termed ESs which differ in either the aromatic or 5-NF domain (McKibbin et al., 2012).

ES1 enhanced  $Ca^{2+}$  leakage from the ER in a dose-dependent manner leading to a dose-dependent attenuation of the cytosolic responses to TG, seen as a decrease of post-TG AUC values (Figure 1). Using this paradigm for the action of ES1 on  $Ca^{2+}$  homeostasis and the online protocol, we analyzed the action of ES compounds at the highest concentration tested with ES1, namely 10  $\mu$ M (Figure 2). The most obvious effects were seen immediately after application of ES1, ES2, and ES24 in the bath solution (Figures 2B and 2C). Strikingly, the increase of  $[Ca^{2+}]_{cyt}$  was steeper and the decrease of  $[Ca^{2+}]_{ER}$  faster upon treatment with ES24 than with either ES1 or ES2 (Figures 2B and 2C). Accordingly, the half-time of  $[Ca^{2+}]_{ER}$  decay before TG application (pre-TG  $t_{1/2}$ ) was approximately two times shorter for ES24 than for ES1 at 10  $\mu$ M (Figure 2G). Therefore, the ER was completely empty at the end of the 17-min treatment with ES24 and cytosolic TG responses were absent (Figure 2F), meaning that we were not able to estimate the actual increase in  $Ca^{2+}$  leakage induced by ES24, i.e., post-TG  $t_{1/2}$  (Figure 2H). As an alternative, we applied TG and ES24 simultaneously and found that this combination results in a 5-fold reduction in post-TG  $t_{1/2}$ , suggesting that ES24 is a potent enhancer of  $Ca^{2+}$  leakage (Figure S2). We also observed a continuous increase of  $[Ca^{2+}]_{cyt}$  after 10–12 min exposure to ES24, pointing toward the risk of non-selective, cytotoxic effects of ES24 at prolonged exposures (Figure 2B). By contrast to ES24, the effects of ES2 on both  $[Ca^{2+}]_{cyt}$  and  $[Ca^{2+}]_{ER}$  were less pronounced than those of ES1 (Figures 2B and 2C). The pre-TG  $t_{1/2}$  for the decay of  $[Ca^{2+}]_{ER}$  induced by ES2 was about twice as long as in the presence of ES1 (Figure 2G). Accordingly, the loss of ER  $Ca^{2+}$  and the  $Ca^{2+}$  accumulation in cytosol were less pronounced under the treatment with ES2 (Figure 2C) and cytosolic TG responses were detectable (Figure 2F). In contrast, ESR35, which has previously been used as an inactive control

(I and J) The area under the curve of TG responses in the experiments shown in (D) (post-TG AUC) (I) and the half-time of TG-induced decay of  $[Ca^{2+}]_{ER}$  shown in (E) (post-TG  $t_{1/2}$ ) (J) were quantified for the time between 1,200 and 1,800 s.

Time points of ES and TG application are indicated with vertical lines in (A–D) (mock/ES; 1  $\mu$ M TG). Mock denotes DMSO controls. Data are presented as means  $\pm$  SEM. n.a., not analyzed; n.s., not significant; \* $p < 0.05$ ; \*\*\* $p < 0.001$ .  $N = 25$ –48 cells per experimental setting. See also Figure S2.

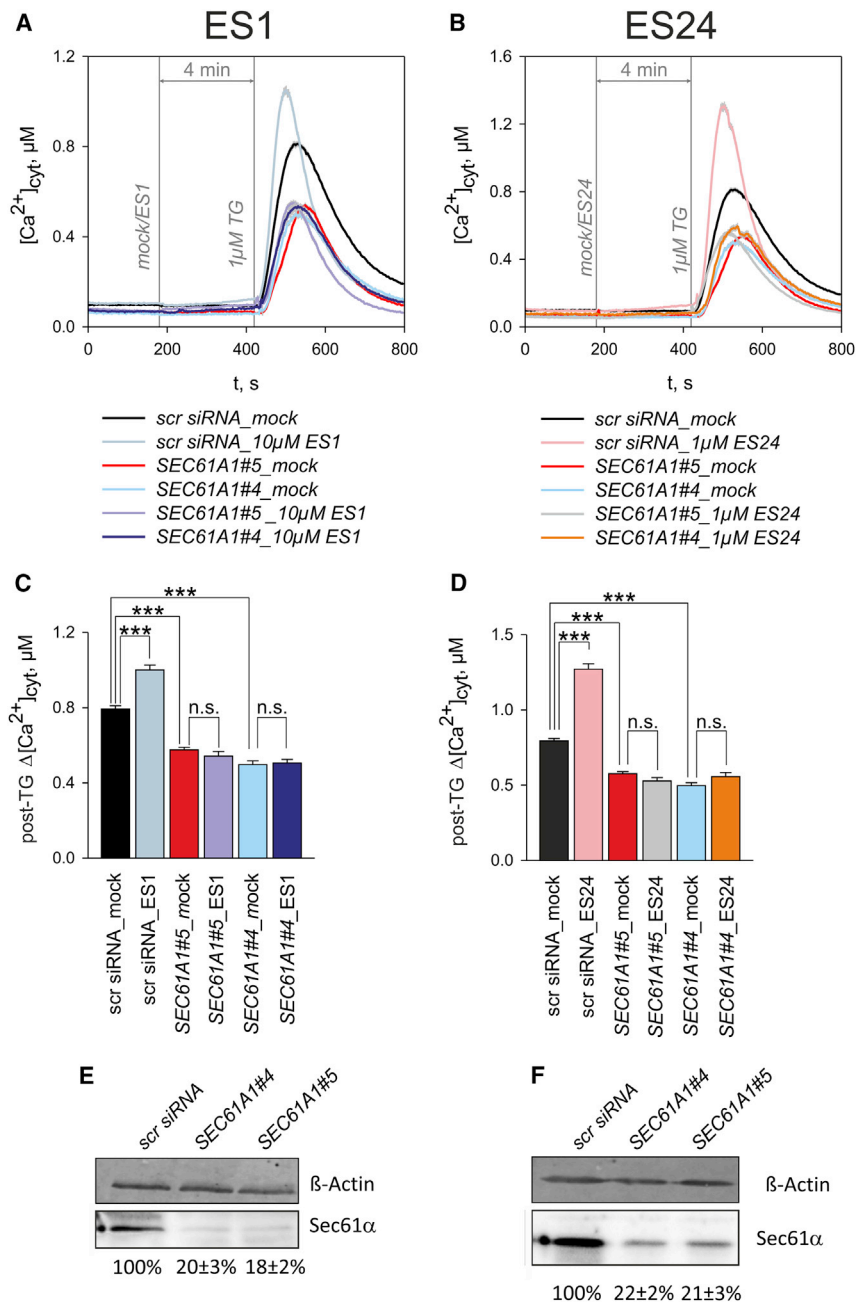

**Figure 3. siRNA-Mediated Silencing of SEC61A1 Abolished the Effects of ES1 and ES24 on  $Ca^{2+}$  Homeostasis**

(A and B) The time courses of TG responses in cytosolic  $Ca^{2+}$  illustrate the loss of effects of ES1 (A) and ES24 (B) on  $Ca^{2+}$  leakage after silencing SEC61A1 with two different siRNAs (SEC61A1#4 and SEC61A15). Experiments with control siRNA (scrRNA) and DMSO controls (mock) are superimposed for comparison. Application times are indicated by vertical lines (mock/ES1, mock/ES24, 1 μM TG).

(C and D) Relative amplitudes of cytosolic TG responses (post-TG  $\Delta[Ca^{2+}]_{cyt}$ ) were used to quantify the effects of ES1 (C) and ES24 (D) in the experiments illustrated in (A and B), respectively.

(E and F) Relative contents of Sec61α protein in cells treated with SEC61A1 siRNAs are given as percentage of the Sec61α content in cells treated with scrRNA for the experiments with ES1 (E) and ES24 (F).

Data obtained in six different silencing experiments are presented as means  $\pm$  SEM. n.s., not significant; \*\*\*p < 0.001. N = 94–222 cells per experimental setting. See also Figure S3.

SEC61A1#4 and SEC61A1#5, were used to silence SEC61A1, and a scrambled siRNA (scr siRNA) was used as a control. Following our online protocol, HeLa cells were exposed to 10 μM ES1 and ES24, and the amplitude of cytosolic TG responses (post-TG  $\Delta[Ca^{2+}]_{cyt}$ ) was measured as an indicator for  $Ca^{2+}$  leakage (Figures 3A and 3B). In cells treated with either of two independent siRNAs, SEC61A1#4 and SEC61A1#5A, we consistently observed lower peaks in the cytosolic responses to TG (Figures 3A and 3B), and the post-TG  $\Delta[Ca^{2+}]_{cyt}$  was about 35%–40% lower than in scr siRNA-treated cells (Figures 3C and 3D). Similar effects of SEC61A1 silencing on cytosolic TG responses have been observed previously and were attributed to a decrease in Sec61-mediated  $Ca^{2+}$  leakage from ER (Erdmann et al., 2011). Western blot anal-

(Cross et al., 2009a; McKibbin et al., 2012), was largely ineffective on both  $[Ca^{2+}]_{cyt}$  and  $[Ca^{2+}]_{ER}$  (Figures 2D and 2E). ES47, however, displayed a small but statistically significant inhibition of  $Ca^{2+}$  leakage from ER (Figure 2I) that was paralleled by an increase in the post-TG half-time by circa 16% (Figure 2J).

### The 5-NF Domain of ES1 Enhances $Ca^{2+}$ Fluxes through Sec61 Complexes

To examine the mechanism through which ES1 enhances  $Ca^{2+}$  leak, cells were depleted of Sec61α using small interfering RNA (siRNA). We performed these experiments in HeLa cells, in which silencing efficiencies of about 80% are routinely achieved (Lang et al., 2011b). Two independent siRNAs,

ysis confirmed that the two siRNAs reduced the Sec61α subunit by circa 80%–82% in HeLa cells (Figures 3E and 3F). The cytosolic TG responses of scr siRNA-treated HeLa cells exposed to ES1 and ES24 peaked higher and were of shorter duration than mock treated cells (Figures 3A and 3B), as for HEK D1ER cells (cf. Figures 1 and 2). Accordingly, post-TG  $\Delta[Ca^{2+}]_{cyt}$  values were approximately 32% higher in the scr siRNA cells exposed to 10 μM ES1 (Figures 3A and 3C). However, 10 μM ES1 failed to increase post-TG  $\Delta[Ca^{2+}]_{cyt}$  in the cells treated with SEC61A1#4 or SEC61A1#5 (Figures 3A and 3C). Similarly, 1 μM ES24 enhanced post-TG  $\Delta[Ca^{2+}]_{cyt}$  values by about 62% in scr siRNA-treated cells but it was completely ineffective after silencing SEC61A1 (Figures 3B and 3D). A potential explanation

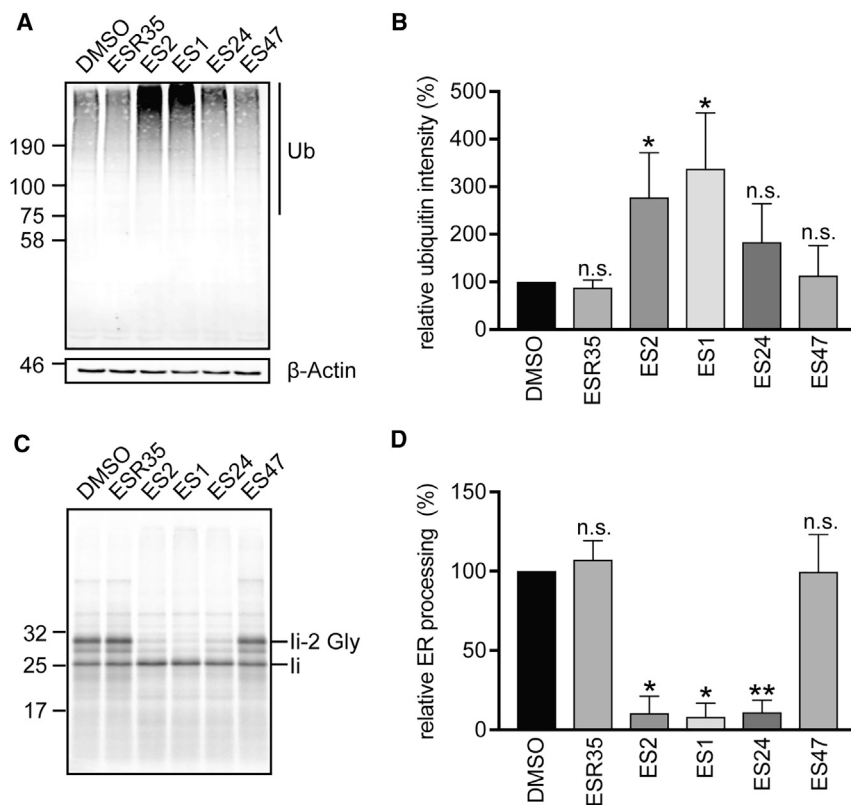

**Figure 4. Differential Effects of ES1 Analogs on Protein Translocation and Degradation**

(A and B) HeLa cells were treated with ES1 analogs (8  $\mu$ M) or with equal amounts of DMSO for 8 h. Cell lysates were analyzed by immunoblotting with an anti-ubiquitin (Ub) antibody (A). Ubiquitin signals were normalized relative to  $\beta$ -actin loading controls and normalized ubiquitin intensities are expressed relative to DMSO controls (B). The total levels of poly-ubiquitinated proteins were markedly increased in cells treated with ES1 and ES2 but not with ESR35 and ES47, while the effects of ES24 were not statistically significant compared with DMSO controls.

(C and D) ES1, ES2, and ES24 reduced *in vitro* the glycosylation of a model membrane glycoprotein, the invariant chain (li) of the class II major histocompatibility complex, while ESR35 and ES47 had no inhibitory effect. Fully glycosylated li is denoted by li-2 Gly (C). Pancreatic ER ribosomes were pre-incubated for 1 h with ES1 analogs (250  $\mu$ M) or with equal amounts of DMSO. Ratios of signal intensities li-2 Gly/li were used as a measure for total protein translocation and expressed relative to DMSO controls to estimate the relative ER processing (D). Quantifications are given as means  $\pm$  SEM for three translocation experiments and six ubiquitination assays. n.s., not significant; \* $p < 0.05$ ; \*\* $p < 0.01$ .

for this finding is that ES1 and ES24 were not effective after silencing *SEC61A1* because of low post-TG  $\Delta[\text{Ca}^{2+}]_{\text{cyt}}$  levels. As an additional control, we have therefore reduced the amplitude of cytosolic TG responses via an independent mechanism, namely by reducing SERCA protein levels to about 60% using *siRNA SERCA2*. Under these conditions, the levels of post-TG  $\Delta[\text{Ca}^{2+}]_{\text{cyt}}$  were as low as those measured after silencing *SEC61A1* and, remarkably, we found that 10  $\mu$ M ES1 and 1  $\mu$ M ES24 enhanced the cytosolic TG responses (Figure S3). Thus, these results strongly suggest that the mechanism by which ES1 and ES24 disrupt cellular  $\text{Ca}^{2+}$  homeostasis is via a specific enhancement of Sec61-mediated  $\text{Ca}^{2+}$  leakage. Hence, we conclude that ER resident Sec61 complexes are targets for both ES1 and ES24.

#### Differential Effects of ES Compounds on Protein Degradation and ER Translocation

ES1 interacts with the p97 complex and influences deubiquitinating processes that are mediated by p97-associated enzymes thereby inhibiting downstream proteasomal degradation and protein quality control (Wang et al., 2008). One of the hallmarks of this effect is an accumulation of high-molecular-weight poly-ubiquitinated species in cells exposed to ES1 for several hours (Wang et al., 2008; McKibbin et al., 2012), and we used this as a readout to compare the effects of our ES compounds on cellular ubiquitin homeostasis and related protein quality control processes. As described previously (Wang et al., 2008; McKibbin et al., 2012), the treatment of HeLa cells with 8  $\mu$ M ES1 induced a  $\sim$ 3.4-fold increase of total poly-ubiquitinated species when compared with control cells (Figures 4A and 4B).

Likewise, a substantial, accumulation of poly-ubiquitinated species was also observed in cells treated with ES2 (Figures 4A and 4B). In contrast, the effects of ES24 were by far less robust and, although a modest qualitative increase in signal was sometimes apparent (Figure 4A, cf. lanes 1 and 4), quantification showed that any changes were not statistically significant when compared with cells treated either with DMSO or ESR35 (Figure 4B). We speculate that the absence of any clear perturbation of ubiquitin homeostasis following treatment with ES24 reflects its lack of the distinct aromatic domain present in ES1 (cf. Figure 2A). This region is proposed to enhance the inhibitory effects of ES1 on the degradation of misfolded membrane proteins by targeting the compound to the ER where it may preferentially inhibit membrane-bound p97 (Wang et al., 2010). ES47 was also ineffective at causing any accumulation of poly-ubiquitinated species (Figure 4B) and, since it lacks an intact 5-NF domain (cf. Figure 2A), our findings support the proposal that this region is important for ES1-mediated inhibition of p97 (Wang et al., 2010). In summary, of the ES compounds that we analyzed, only ES1 and ES2 appear to cause the accumulation of endogenous poly-ubiquitinated species in HeLa cells, most likely via their inhibition of protein degradation (Fiebigler et al., 2004; Wang et al., 2010; McKibbin et al., 2012).

Since it has been shown that ES1 and ES2 inhibit Sec61-mediated protein translocation into the ER (Cross et al., 2009a), we studied the effects of our ES compounds using an established cell-free membrane translocation assay. The histocompatibility leukocyte antigen (HLA) class II histocompatibility antigen gamma chain (li) was used as a model membrane glycoprotein, and its integration into ER-derived canine



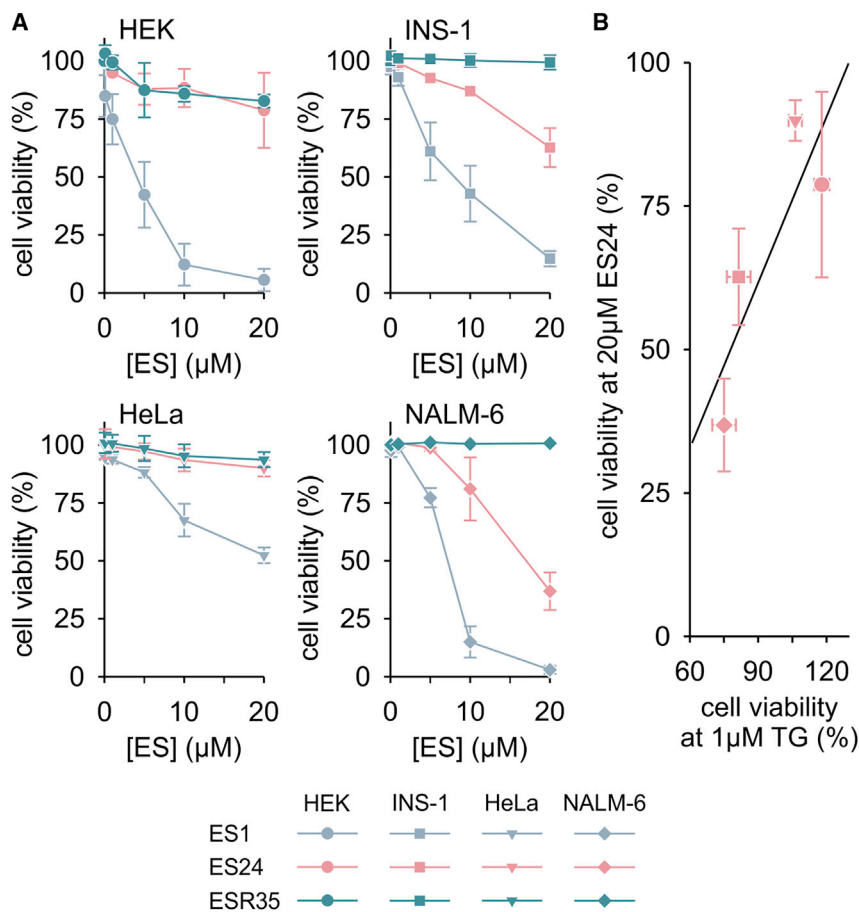

### Figure 5. ES24 Reduces Cell Viability in a $\text{Ca}^{2+}$ -Dependent Manner

(A) HEK, INS-1, HeLa, and NALM-6 cells were exposed for 24 h to various ES compounds (ES) and cell viability was measured as the percentage of living cells. While ES1 was cytotoxic to all cell lines, ESR35 was not cytotoxic at all and ES24 displayed mild effects on some cell lines.

(B) Comparison of cell viabilities for 24-h treatments with 20  $\mu\text{M}$  ES24 and 1  $\mu\text{M}$  TG. A strong  $\text{Ca}^{2+}$ -dependent component in cytotoxicity of ES24 is suggested by the linear correlation (black line) of the cell viabilities measured in the individual cell lines after 24 h treatment with 20  $\mu\text{M}$  ES24 and 1  $\mu\text{M}$  TG. Color and symbol coding for cell lines and substances are shown below panels. Cell viability was measured per duplicate in three independent experiments, normalized to DMSO controls and is presented as means  $\pm$  SD.

selectively inhibits protein translocation at the ER, most likely by interacting with Sec61 complexes. This view is strongly supported by the enhancement of Sec61-dependent  $\text{Ca}^{2+}$  leakage that is observed when cells are treated with either ES1 or ES24.

### Differential Effects of ES Compounds on Cell Death

ES1 has been shown to induce cell death in human blood cancer cell lines, and the 5-NF domain of ES1 was apparently

pancreatic microsomes that had been pre-incubated with the different ES compounds was investigated as described previously (Cross et al., 2009a). Hence, the efficiency of the Sec61-mediated translocation of the N-terminal domain of li into the ER lumen was determined by quantifying its N-glycosylation. As reported previously, ES1 and ES2 inhibited membrane translocation by  $\sim 90\%$  (Figures 4C and 4D), while ESR35 had no effect (Cross et al., 2009a). Strikingly, the effects of ES24 and ES47 on protein translocation mirrored their effects on Sec61-dependent  $\text{Ca}^{2+}$  leakage (Figure 2), and hence ES24 inhibited the N-glycosylation of li to a similar extent as ES1 and ES2, while ES47 had no effect (Figures 4C and 4D).

In summary, ES1 and ES2 efficiently inhibited both protein poly-ubiquitination *in cellula* and ER protein translocation *in vitro*, while ESR35 and ES47 showed no effect on either the ubiquitination or translocation assays (Figure 4). This suggests that ES1 and ES2 have at least two cellular targets within the protein homeostatic network. Firstly, the inhibition of protein translocation into the ER by ES1 and ES2 is most likely due to a direct effect on the Sec61 complex (Cross et al., 2009a). Secondly, ES1 and ES2 may influence de-ubiquitinating processes by interacting directly with p97 (Wang et al., 2008; McKibbin et al., 2012). This dichotomy between Sec61- and p97-mediated effects is apparently absent in the cellular action of ES24, which efficiently inhibits ER translocation but has little if any effect on protein de-ubiquitination (Figure 4). Thus, our results suggest that ES24

pivotal to this cytotoxic effects (Wang et al., 2010; Auner et al., 2013). To evaluate the role of ER  $\text{Ca}^{2+}$  leakage in the cytotoxicity of ES compounds, we next compared the sensitivities of various cell lines with ES1, ES24, and ESR35 (Figure 5). HEK, HeLa, INS-1, and NALM-6 cells were first exposed to these compounds for 24 h at concentrations ranging between 0.1 and 20  $\mu\text{M}$ , and cell viability was then evaluated using the Guava ViaCount assay. As shown in Figure 5A, ES1 was toxic to all cell lines tested. As predicted from the lack of effect of ESR35 on  $\text{Ca}^{2+}$  flux and protein processing (Figures 2 and 4), ESR35 was not toxic to the cell lines tested in the present study (Figure 5A). ES24 exhibited a surprisingly mild cytotoxicity on INS-1 and NALM-6 cells, and had no effect on the viability of HEK and HeLa cells at concentrations up to 20  $\mu\text{M}$  (Figure 5A). Based on the well-defined effects of ES24 on  $\text{Ca}^{2+}$  leakage and protein translocation (Figures 2 and 4) we hypothesized that, in contrast to the more complex effects of ES1 (Wang et al., 2010), the cytotoxicity of ES24 may primarily reflect its effects on Sec61 complexes. To correlate the toxic effects of ES1 and ES24 with an enhancement of ER  $\text{Ca}^{2+}$  leakage, we determined the cell tolerance to the disruption of  $\text{Ca}^{2+}$  homeostasis by treatment with TG for 24 h. As with ES24, we found that HEK and HeLa cells were insensitive to TG (cell viability: HEK, 117.90%  $\pm$  3.32%; HeLa, 106.28%  $\pm$  2.90%), while INS-1 and NALM-6 cells were more prone to the effects of disruption of the  $\text{Ca}^{2+}$  homeostasis by TG (cell viability: INS-1, 81.46%  $\pm$  5.18%; NALM-6, 75.06%  $\pm$  5.20%). Combining the cell viability

data for ES24 and TG, we observed a striking correlation between cell viabilities in the presence of ES24 and TG (Figure 5B), indicating that cell lines with high sensitivity to TG are also more sensitive to ES24. The effects of ES1 and ESR35 on cell viability were not correlated with the cell viabilities under TG treatment (not shown). Although our cytotoxicity studies did not address any potential contribution of the inhibition of protein translocation at ER, our data highlight the role of Sec61-mediated  $\text{Ca}^{2+}$  leakage in the cytotoxic effects of ES24 (Figure 5). Since TG prevents  $\text{Ca}^{2+}$  influx into the ER by inhibiting SERCA pumps, the TG effect can be seen as the counterpart of an enhancement of  $\text{Ca}^{2+}$  leakage. Therefore, the linear relationship between the cytotoxic effects of ES24 and TG shown in Figure 5B suggests that the actions of TG and ES24 may mechanistically converge on ER  $\text{Ca}^{2+}$  depletion. Conversely, the cytotoxic effects of ES1 may be dominated by p97 inhibition.

## DISCUSSION

Growing evidence indicates that Sec61 complexes become permeable for  $\text{Ca}^{2+}$  ions in the wake of protein translocation and generate a leakage of  $\text{Ca}^{2+}$  from ER (Lang et al., 2017). Chemical modulators that inhibit protein translocation at the level of Sec61 complexes may, therefore, have an impact on ER  $\text{Ca}^{2+}$  leakage. Combining biochemical and functional assays, we show two diametrically opposed effects of ES1 on Sec61 complexes. ES1 inhibits protein translocation *in vitro* and enhances Sec61-mediated  $\text{Ca}^{2+}$  leakage *in cellula*. To gain insight into the mechanism behind the action of ES1 on Sec61 complexes, we compared various ES1 analogs and found that the 5-NF moiety of ES1 is critically involved in the effects on Sec61 complexes. Accordingly, ES24, which closely resembles the 5-NF moiety of ES1, displayed the strongest effects on  $\text{Ca}^{2+}$  leakage and the cytotoxic effects of ES24 were strongly  $\text{Ca}^{2+}$  dependent.

ES1 has been shown to inhibit protein degradation at the level of p97, an effect that requires the 5-NF domain (Wang et al., 2010). In this study, we observed an accumulation of poly-ubiquitinated species consistent with such an inhibition of protein degradation by ES1 (Figure 4). It is unclear whether these effects of ES1 on protein degradation disturb  $\text{Ca}^{2+}$  homeostasis in the ER, but, given that ES24 has a strong effect on  $\text{Ca}^{2+}$  leakage without a comparable effect on ubiquitin homeostasis, these processes may be distinct. Nevertheless, it is conceivable that the cellular accumulation of poly-ubiquitinated proteins over a period of hours may affect  $\text{Ca}^{2+}$  leakage. For instance, an increase in cytosolic  $\text{Ca}^{2+}$  levels is detected hours after exposure to proteasome inhibitors (Williams et al., 2013). Notably, in the present study, we found that ES1 enhanced ER  $\text{Ca}^{2+}$  leakage in a timescale of seconds to minutes (Figures 1, 2, and 3). Furthermore, silencing of *SEC61A1* abolished the ES1 effects on ER  $\text{Ca}^{2+}$  leakage completely (Figure 3), indicating that Sec61 complexes are central targets for the action of ES1 at the ER. Like ES1, ES2 and ES24 both enhance ER  $\text{Ca}^{2+}$  leakage (Figure 2) and inhibit protein translocation (Figures 4C and 4D; see also Cross et al., 2009a), and we assume that these effects also reflect the interaction of ES2 and ES24 with Sec61 complexes. Compared with ES1 and ES2, however, ES24 showed the strongest effects on ER  $\text{Ca}^{2+}$  leakage generating a robust response within sec-

onds (Figure 2). Effects on Sec61-mediated  $\text{Ca}^{2+}$  leakage with a similar timescale have been described for inducers of ER stress and protein synthesis inhibitors (Lomax et al., 2002; Van Coppenolle et al., 2004; Lang et al., 2011a; Schäuble et al., 2012). Remarkably, a 10-min exposure to ES1 is also sufficient to observe a reduction in Sec61-mediated protein translocation, suggesting the ES1-mediated inhibition of this process is also a rapid event (Cross et al., 2009a).

The dual effects on Sec61 complexes of ES1, ES2, and ES24 (Figures 3 and 4) indicate that active ES compounds prevent protein translocation into the ER while maintaining Sec61 complexes in a  $\text{Ca}^{2+}$ -permeable state. Thus, the question arises as to how these apparently opposite effects on protein translocation and  $\text{Ca}^{2+}$  leakage can be reconciled in a mechanistic model for the action of ES compounds on Sec61 complexes. Using the crystal structure of canine Sec61 $\alpha$  (Voorhees and Hegde, 2016), we modeled the structure of Sec61 $\alpha$  in the open state (Figure 6A). According to the current view, Sec61 $\alpha$  is formed by ten transmembrane helices arranged in two halves (Rapoport et al., 2017). In the idle state, Sec61 $\alpha$  is closed by the pore ring and the plug structure. After priming by the ribosome binding, the transmembrane helices rotate in a way that the lateral gate formed by transmembrane helices 2 and 7 is opened and the aqueous channel within Sec61 $\alpha$  becomes free for protein translocation (Voorhees and Hegde, 2016). Docking analysis with the Sec61 $\alpha$  structure revealed that ES1 interacts with Sec61 $\alpha$  with a high affinity ( $\Delta G = -9.62$  kcal/mol). Specifically, the 5-NF group of ES1 interacts with H7 and H8 and occupies the volume between H2 and H7 (Figure 6B). Our model predicts that ES24 also binds with a high affinity ( $\Delta G = -9.04$  kcal/mol) and interacts with the N-terminal region of H7 (Figure 6C). Remarkably, the aromatic ring of ES24 and the 5-NF group of ES1 docked at the same place surrounded by H2, H7, and H8 at the cytosolic end of the lateral gate. Docking the 5-NF domain alone revealed that it also binds preferentially at the cytosolic end of the lateral gate (Figure S4). This putative interaction site differs from the presumptive binding sites of other Sec61 inhibitors that have been proposed to stabilize the plug domain in a closed state and to prevent allosterically the opening of Sec61 complexes (van Puyenbroeck and Vermeire, 2018). We have estimated the distance of these presumptive binding sites to the lateral gate and found that, with the exception of T86M, they are quite distant and, therefore, unlikely to affect the binding of ES compounds (Figure S5A). Docking analysis with a structural model of the T86M mutant predicted that T86M has only minor effects on the docking of ES1 and ES24 (Figure S5B). The interactions of ES1 and ES24 with Sec61 $\alpha$  are predicted to adopt rather central positions at short distances to the center of the H2-H7 gap (9.98 and 9.87 Å for ES1 and ES24, respectively). By contrast, the closest distance between ESR35 and the H2-H7 gap was calculated to be 15.06 Å, and the estimated affinity of its interaction with ESR35 is lower ( $\Delta G = -7.91$  kcal/mol). We do not know whether the interaction of ES1 and ES24 with Sec61 $\alpha$  is reversible, but a parsimonious model suggests that these ES compounds interact with the helices forming the lateral gate and hamper conformational changes of Sec61 $\alpha$ . This is equivalent to proposing that ES1 and ES24 promote an open,  $\text{Ca}^{2+}$ -permeable, state of Sec61 $\alpha$  by preventing the closing of the lateral gate (Figure 6D). Compared with other ion channels, this mechanism

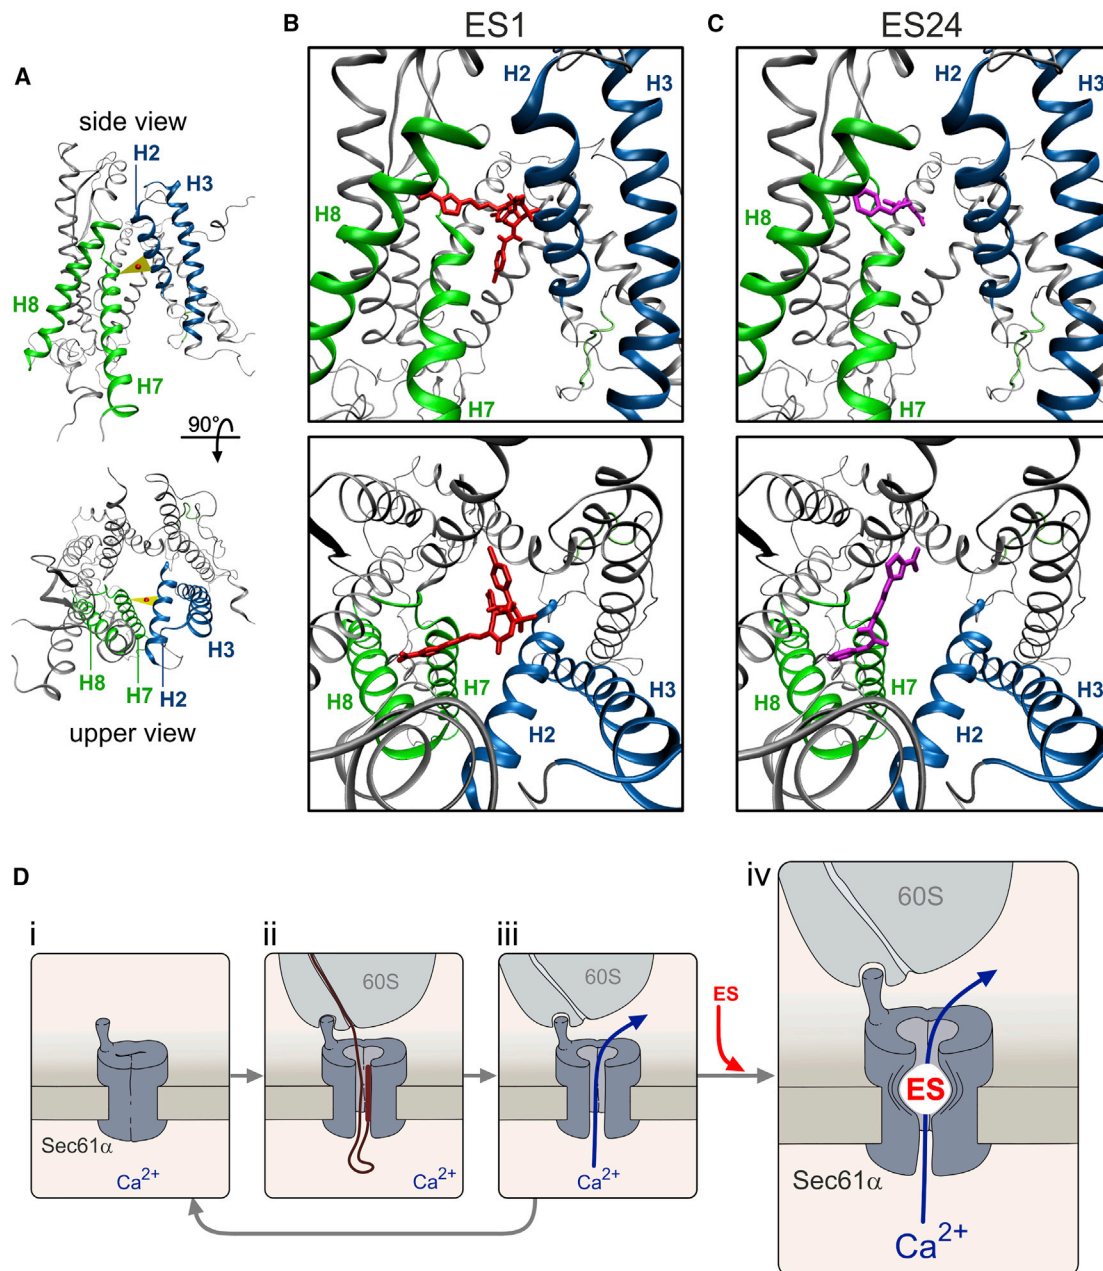

**Figure 6. Molecular Modeling of the Interactions of ES1 and ES24 with Sec61 $\alpha$**

(A) Homology model of the human Sec61 $\alpha$  with the lateral gate in the open conformation. Lateral gate helices are highlighted in colors (H2 and H3, blue; H7 and H8, green). The triangle (yellow) shows the center of mass for the opening between H2 and H7. Overviews depict the Sec61 $\alpha$  model seen from the plane of the membrane with the cytosolic side upward (upper panel, lateral gate in front) and from the cytosol (lower panel, cytosolic side in front).

(B and C) Detailed pictures of the docking positions of ES1 (B) and ES24 (C) with the highest scores (ES1,  $\Delta G = -9.62$  kcal/mol; ES24,  $\Delta G = -9.04$  kcal/mol) in side views (upper panels) and top views (lower panels).

(D) The proposed mode of action of ES1 and ES24 compounds (ES) on Sec61 complexes consider the binding of these compounds to Sec61 $\alpha$  in the open state. Idle Sec61 complexes (i) are engaged in co-translational translocation processes upon binding of ribosome nascent chain complexes. Subsequently, the lateral gate of Sec61 complexes opens and the protein-conducting channel allows the translocation of the nascent chain (ii). After translocation, Sec61 complexes might adopt a Ca<sup>2+</sup>-permeable state with an aqueous channel that allows Ca<sup>2+</sup> leakage from ER (iii). The cycle is closed when the ribosomes de-attach and Sec61 complexes return to the idle state. By binding to Sec61 complexes in the open state, ES compounds prevent the closing of the lateral gate with the consequence that Sec61 complexes are progressively captured in a Ca<sup>2+</sup>-permeable state (iv). For simplicity, only the channel-forming subunit (Sec61 $\alpha$ ) and the large ribosome subunit (60S) are depicted.

See also [Figures S4 and S5](#).

is quite unique in that ES compounds prevent closing and leave the Sec61 $\alpha$  channel open for ion permeation. For instance, earlier studies on the action of small molecules on voltage-dependent Na<sup>+</sup> channels have identified a foot in the door effect, in which the compound enters the open channel and prevents the gate from closing by binding within the pore (e.g., Yeh and Armstrong, 1978). In general, however, the consequence of such a foot in the door effect is that ion movements through the pore are blocked. Our model implies that ES compounds keep the lateral gate open as a foot in the door allowing Ca<sup>2+</sup> ions to move freely through the aqueous channel present in Sec61 $\alpha$  after protein translocation (Figure 6D).

ES1 has been proposed as an anticancer agent (van Puyenbroeck and Vermeire, 2018) and, accordingly, aqueous soluble derivatives of ES1 have been developed for cancer therapy (Ding et al., 2016). As shown previously with multiple myeloma cell lines (Auner et al., 2013), we found that the cytotoxicity of ES1 varied between cell lines. ES1 and ES24 not only enhanced the Sec61-mediated Ca<sup>2+</sup> leakage from ER (Figures 2 and 3), but also inhibited protein translocation (Figure 4). Our model predicts that these ES compounds enhance the Ca<sup>2+</sup> leakage in the short term and, in the long term, deplete the pool of translocation-competent Sec61 complexes and thereby restrict the process of co-translational protein translocation (Figure 6). We found that the gain of Ca<sup>2+</sup> leakage induced by ES24 was the predominant mechanism in the cytotoxicity of the compound and that the degree of toxicity depends on cell type (Figure 5). Thus, our study identified ES24 as a small molecule that targets Sec61 complexes and causes cell-type-specific Ca<sup>2+</sup>-dependent cell death.

## SIGNIFICANCE

**Small molecules that target Sec61 complexes have been described as antimicrobial and anticancer agents (van Puyenbroeck and Vermeire, 2018). While inhibition of protein translocation by these compounds has been a focus of research, their effects on the ion channel properties of Sec61 complexes are poorly understood. Sec61 complexes can support Ca<sup>2+</sup> leakage from ER (Lang et al., 2017), hence modulation of Sec61 gating may affect Ca<sup>2+</sup> homeostasis in the cell. Here we show that inhibition of protein translocation by ES1 is associated with a gain of Sec61-mediated Ca<sup>2+</sup> leakage from the ER lumen. Collectively, our data suggest that the 5-NF ring of ES1 slides into and obstructs the lateral gate, capturing Sec61 complexes in a Ca<sup>2+</sup>-permeable, open state. This unprecedented mechanism of action best resembles a “foot in the door” effect, in which ion channel closing is prevented without interference of the ion-conducting pathway. We have tested selected ES1 analogs and found that ES24, in which the chemical structure is basically reduced to the 5-NF domain of ES1, has higher selectivity toward Sec61 complexes than the parental ES1. Hence, among the ES1 analogs tested, ES24 showed the strongest effects on Sec61-mediated Ca<sup>2+</sup> leakage and, consequently, the cytotoxic effects of ES24 were Ca<sup>2+</sup> dependent. Thus, our work illustrates a strategy with therapeutic potential, namely one which targets cellular Ca<sup>2+</sup> homeostasis by**

**taking advantage of the ion channel properties of Sec61 complexes.**

## STAR★METHODS

Detailed methods are provided in the online version of this paper and include the following:

- KEY RESOURCES TABLE
- CONTACT FOR REAGENT AND RESOURCES SHARING
- EXPERIMENTAL MODEL AND SUBJECT DETAILS
- METHOD DETAILS
  - Synthesis of Eeyarestatin (ES) Compounds
  - *In Vitro* Translocation Assay
  - *In Cellula* Ubiquitination Assay
  - Gene Silencing
  - Live Cell Calcium Imaging
  - Cell Viability Assay
  - Homology Modelling and Docking Protocols
- QUANTIFICATION AND STATISTICAL ANALYSIS
- DATA AND SOFTWARE AVAILABILITY

## SUPPLEMENTAL INFORMATION

Supplemental Information includes five figures and can be found with this article online at <https://doi.org/10.1016/j.chembiol.2019.01.010>.

## ACKNOWLEDGEMENTS

We thank Roger Y. Tsien, Bernhard Dobberstein, and Per-Olof Berggren for kindly providing us with the calcium sensor D1ER, the HLA class II histocompatibility antigen gamma chain, and the INS-1 cell line, respectively. We acknowledge Dr. Veit Flockerzi (Saarland University) for helpful comments, Dr. Stephan Philipp (Saarland University) for his help in generating the HEK D1ER cell line, and Heidi Löhr and Martin Simon-Thomas (Saarland University) for their excellent technical assistance. This work was supported by the Deutsche Forschungsgemeinschaft (DFG) grants SFB 894(to R.Z. and A.C.) and IRTG 1830 (to R.Z.), the Biotechnology and Biological Sciences Research Council (BBSRC) Doctoral Training Program Award BB/J014478/1 (S.O.), and the Wellcome Trust Investigator Award in Science (2049)57/Z/16/Z (to S.H.).

## AUTHOR CONTRIBUTIONS

I.G., S.O'K., T.P., M.-C.K., D.N., and C.M. performed the experiments and analyzed the data. V.H., E.S., S.H., R.Z., and A.C. supervised the experiments. M.P., H.M.W., S.L. F., R.C.W., and E.S. devised, developed, and synthesized the ES compounds. S.H., R.Z., and A.C. designed the study and wrote the manuscript with the contribution of all authors.

## DECLARATION OF INTERESTS

The authors declare no competing interests.

Received: May 30, 2018

Revised: October 6, 2018

Accepted: January 24, 2019

Published: February 21, 2019

## REFERENCES

Aletrari, M.O., McKibbin, C., Williams, H., Pawar, V., Pietroni, P., Lord, J.M., Flitsch, S.L., Whitehead, R., Swanton, E., High, S., and Spooner, R.A. (2011). Eeyarestatin 1 interferes with both retrograde and anterograde intracellular trafficking pathways. *PLoS One* 6, e22713.

- Aller, S.G., Yu, J., Ward, A., Weng, Y., Chittaboina, S., Zhuo, R., Harrell, P.M., Trinh, Y.T., Zhang, Q., Urbatsch, I.L., and Chang, G. (2009). Structure of P-glycoprotein reveals a molecular basis for poly-specific drug binding. *Science* 323, 1718–1722.
- Asfari, M., Janjic, D., Meda, P., Li, G., Halban, P.A., and Wollheim, C.B. (1992). Establishment of 2-mercaptoethanol-dependent differentiated insulin-secreting cell lines. *Endocrinology* 130, 167–178.
- Auner, H.W., Moody, A.M., Ward, T.H., Kraus, M., Milan, E., May, P., Chaidos, A., Driessen, C., Cenci, S., Dazzi, F., et al. (2013). Combined inhibition of p97 and the proteasome causes lethal disruption of the secretory apparatus in multiple myeloma cells. *PLoS One* 8, e74415.
- Camello, C., Lomax, R., Petersen, O.H., and Tepikin, A.V. (2002). Calcium leak from intracellular stores – the enigma of calcium signalling. *Cell Calcium* 32, 355–361.
- Carreras-Sureda, A., Pihán, P., and Hetz, C. (2018). Calcium signaling at the endoplasmic reticulum: fine-tuning stress responses. *Cell Calcium* 70, 24–31.
- Claesson, L., Larhammar, D., Rask, L., and Peterson, P.A. (1983). cDNA clone for the human invariant gamma chain of class II histocompatibility antigens and its implications for the protein structure. *Proc. Natl. Acad. Sci. U S A* 80, 7395–7399.
- Cross, B.C.S., McKibbin, C., Callan, A.C., Roboti, P., Piacenti, M., Rabu, C., Wilson, C.M., Whitehead, R., Flitsch, S.L., Pool, M.R., et al. (2009a). Eeyarestatin I inhibits Sec61-mediated protein translocation at the endoplasmic reticulum. *J. Cell Sci.* 122, 4393–4400.
- Cross, B.C.S., Sinning, I., Luirink, J., and High, S. (2009b). Delivering proteins for export from cytosol. *Nat. Rev. Mol. Cell Biol.* 10, 255–264.
- Ding, R., Zhang, T., Xie, J., Williams, J., Ye, Y., and Chen, L. (2016). Eeyarestatin I derivatives with improved aqueous solubility. *Bioorg. Med. Chem. Lett.* 26, 5177–5181.
- Dudek, J., Pfeffer, S., Lee, P.H., Jung, M., Cavalié, A., Helms, V., Förster, F., and Zimmermann, R. (2015). Protein transport into the human endoplasmic reticulum. *J. Mol. Biol.* 427, 1159–1175.
- Erdmann, F., Schäuble, N., Lang, S., Jung, M., Honigmann, A., Ahmad, M., Dudek, J., Benedix, J., Harsman, A., Kopp, A., et al. (2011). Interaction of calmodulin with Sec61a limits  $Ca^{2+}$  leakage from the endoplasmic reticulum. *EMBO J.* 30, 17–31.
- Fiebiger, E., Hirsch, C., Vyas, J.M., Gordon, E., Ploegh, H.L., and Tortorella, D. (2004). Dissection of the dislocation pathway for type I membrane proteins with a new small molecule inhibitor, eeyarestatin. *Mol. Biol. Cell* 15, 1635–1646.
- Figueiredo Costa, B., Cassella, P., Colombo, S.F., and Borgese, N. (2018). Discrimination between endoplasmic reticulum and mitochondria by spontaneously inserting tail-anchored proteins. *Traffic* 19, 182–197.
- Lang, S., Erdmann, F., Jung, M., Wagner, R., Cavalié, A., and Zimmermann, R. (2011a). Sec61 complexes form ubiquitous ER  $Ca^{2+}$  leak channels. *Channels* 5, 228–235.
- Lang, S., Schäuble, N., Cavalié, A., and Zimmermann, R. (2011b). Live cell calcium imaging combined with siRNA mediated gene silencing identifies  $Ca^{2+}$  leak channels in the ER membrane and their regulatory mechanisms. *J. Vis. Exp.* 53, e2730.
- Lang, S., Pfeffer, S., Lee, P.-H., Cavalié, A., Helms, V., Förster, F., and Zimmermann, R. (2017). An update on Sec61 channel functions, mechanisms and related diseases. *Front. Physiol.* 8, 887.
- Le Gall, S., Neuhofer, A., and Rapoport, T.A. (2004). The endoplasmic reticulum membrane is permeable to small molecules. *Mol. Biol.* 15, 447–455.
- Lomax, R.B., Camello, C., Van Coppenolle, F., and Petersen, O.H. (2002). Basal and physiological  $Ca^{2+}$  leak from the endoplasmic reticulum of pancreatic acinar cells. Second messenger-activated channels and translocons. *J. Biol. Chem.* 277, 26479–26485.
- Martí-Renom, M.A., Stuart, A.C., Fiser, A., Sánchez, R., Melo, F., and Sali, A. (2000). Comparative protein structure modeling of genes and genomes. *Annu. Rev. Biophys. Biomol. Struct.* 29, 291–325.
- McKibbin, C., Mares, A., Piacenti, M., Williams, H., Roboti, P., Puumalainen, M., Callan, A.C., Lesiak-Mieczkowska, K., Linder, S., Harant, H., et al. (2012). Inhibition of protein translocation at the endoplasmic reticulum promotes activation of the unfolded protein response. *Biochem. J.* 442, 639–648.
- Means, S., Smith, A.J., Shepherd, J., Shadid, J., Fowler, J., Wojcikiewicz, R.J.H., Mazel, T., Smith, G.D., and Wilson, B.S. (2006). Reaction diffusion model of calcium dynamics with realistic ER geometry. *Biophys. J.* 91, 537–557.
- Morris, G.M., Huey, R., Lindstrom, W., Sanner, M.F., Belew, R.K., Goodsell, D.S., and Olson, A.J. (2009). AutoDock4 and AutoDockTools4: automated docking with selective receptor flexibility. *J. Comput. Chem.* 30, 2785–2791.
- Naydenov, N.G., Harris, G., Brown, B., Schaefer, K.L., Das, S.K., Fischer, P.B., and Ivanov, A.I. (2012). Loss of soluble N-ethylmaleimide-sensitive factor attachment protein  $\alpha$  (sSNAP) induces epithelial cell apoptosis via down-regulation of Bcl-2 expression and disruption of the golgi. *J. Biol. Chem.* 287, 5928–5941.
- Palmer, A.E., Jin, C., Reed, J.C., and Tsien, R.Y. (2004). Bcl-2-mediated alterations in endoplasmic reticulum  $Ca^{2+}$  analysed with an improved genetically encoded fluorescent sensor. *Proc. Natl. Acad. Sci. U S A* 101, 17404–17409.
- Pfeffer, S., Burbaum, L., Unverdorben, P., Pech, M., Chen, Y., Zimmermann, R., Beckmann, R., and Forster, F. (2015). Structure of the native Sec61 protein-conducting channel. *Nat. Commun.* 6, 8403.
- Phillips, J.C., Braun, R., Wang, W., Gumbart, J., Tajkhorshid, E., Villa, E., Chipot, C., Skeel, R.D., Kalé, L., and Schulten, K. (2005). Scalable molecular dynamics with NAMD. *J. Comput. Chem.* 26, 1781–1802.
- Rapoport, T.A., Li, L., and Park, E. (2017). Structural and mechanistic insight into protein translocation. *Annu. Rev. Cell Dev. Biol.* 33, 369–390.
- Rasmussen, S.G., Choi, H.J., Fung, J.J., Pardon, E., Casarosa, P., Chae, P.S., Devree, B.T., Rosenbaum, D.M., Thian, F.S., Kobilka, T.S., et al. (2011). Structure of a nanobody-stabilized active state of the b2 adrenoceptor. *Nature* 469, 175–180.
- Schäuble, N., Cavalié, A., Zimmermann, R., and Jung, M. (2014). Interaction of *Pseudomonas aeruginosa* Exotoxin A with the human Sec61 complex suppresses passive calcium efflux from the endoplasmic reticulum. *Channels* 8, 76–83.
- Schäuble, N., Lang, S., Jung, M., Cappel, S., Schorr, S., Ulucan, Ö., Linxweiler, J., Dudek, J., Blum, R., Helms, V., et al. (2012). BiP-mediated closing of the Sec61 channel limits  $Ca^{2+}$  leakage from the ER. *EMBO J.* 31, 3282–3296.
- Simon, S.M., and Blobel, G. (1991). A protein conducting channel in the endoplasmic reticulum. *Cell* 65, 371–380.
- Sztretye, M., Yi, J., Figueroa, L., Zhou, J., Royer, L., and Eduardo Ríos, E. (2011). D4cpv-calsequestrin: a sensitive ratiometric biosensor accurately targeted to the calcium store of skeletal muscle. *J. Gen. Physiol.* 138, 211–229.
- Van Coppenolle, F., Vanden Abeele, F., Slomianny, C., Flourakis, M., Hesketh, J., Dewailly, E., and Prevarskaya, N. (2004). Ribosome translocon complex mediates calcium leakage from endoplasmic reticulum stores. *J. Cell Sci.* 117, 4135–4142.
- van Puyenbroeck, V., and Vermeire, K. (2018). Inhibitors of protein translocation across membranes of the secretory pathway: novel antimicrobial and anticancer agents. *Cell. Mol. Life Sci.* 75, 1541–1558.
- Voorhees, R.M., and Hegde, R.S. (2016). Structure of the Sec61 channel opened by a signal sequence. *Science* 351, 88–91.
- Wang, Q., Li, L., and Ye, Y. (2008). Inhibition of p97-dependent protein degradation by Eeyarestatin I. *J. Biol. Chem.* 283, 7445–7454.
- Wang, Q., Mora-Jensen, H., Weniger, M.A., Perez-Galan, P., Wolford, C., Hai, T., Ron, D., Chen, W., Trenkle, W., Wiestner, A., and Ye, Y. (2009). ERAD inhibitors integrate ER stress with an epigenetic mechanism to

activate BH3-only protein NOXA in cancer cells. *Proc. Natl. Acad. Sci. U S A* 106, 2200–2205.

Wang, Q., Shinkre, B.A., Lee, J.G., Weniger, M.A., Liu, Y., Chen, W., Wiestner, A., Trenkle, W.C., and Ye, Y. (2010). The ERAD inhibitor eeyarestatin I is a bifunctional compound with a membrane-binding domain and a p97/VCP inhibitory group. *PLoS One* 5, e15479.

Williams, J.A., Hou, Y., Ni, H.-M., and Ding, W.-X. (2013). Role of intracellular calcium in proteasome inhibitor-induced endoplasmic reticulum stress, autophagy and cell death. *Pharm. Res.* 30, 2279–2298.

Wiederstein, M., and Sippl, M.J. (2007). ProSA-web: interactive web service for the recognition of errors in three-dimensional structures of proteins. *Nucleic Acids Res.* 35, W407–W410.

Wirth, A., Jung, M., Bies, G., Frie, M., Tyedmers, J., Zimmermann, R., and Wagner, R. (2003). The Sec61p complex is a dynamic precursor activated channel. *Mol. Cell* 12, 261–268.

Yeh, J.Z., and Armstrong, C.M. (1978). Immobilisation of gating charge by a substance that stimulates inactivation. *Nature* 273, 387–389.

## STAR★METHODS

## KEY RESOURCES TABLE

| REAGENT or RESOURCE                                                                          | SOURCE                                   | IDENTIFIER                        |
|----------------------------------------------------------------------------------------------|------------------------------------------|-----------------------------------|
| <b>Antibodies</b>                                                                            |                                          |                                   |
| Anti-Sec61 antibody (against the carboxy terminal peptide (14-mer) of human Sec61 $\alpha$ ) | This study                               | N/A                               |
| Anti-Serca2 ATPase                                                                           | Sigma-Aldrich                            | Cat# S1439; RRID: AB_261442       |
| Polyclonal anti- $\beta$ -actin antibody                                                     | Abcam                                    | Cat# Ab8227; RRID: AB_2305186     |
| Monoclonal anti- $\beta$ -actin antibody                                                     | Sigma-Aldrich                            | Cat# A5441; RRID: AB_476744       |
| Mono- and polyubitinylated conjugates monoclonal antibody (FK2)                              | Enzo Life Sciences                       | Cat# PW8810; RRID: AB_10541840    |
| IRDye 680 RD Goat anti-Rabbit IgG (H + L) Secondary Antibody                                 | LI-COR Biotechnology                     | Cat# 926-68071; RRID: AB_10956166 |
| IRDye 800 RD Goat anti-Mouse IgG (H + L) Secondary antibody                                  | LI-COR Biotechnology                     | Cat# 926-32210; RRID: AB_621842   |
| <b>Chemicals, Peptides, and Recombinant Proteins</b>                                         |                                          |                                   |
| Eyarestatin 1 (ES1)                                                                          | This study                               | N/A                               |
| Eyarestatin 2 (ES2)                                                                          | This study                               | N/A                               |
| ES24                                                                                         | This study                               | N/A                               |
| ESR35                                                                                        | This study                               | N/A                               |
| ES47                                                                                         | This study                               | N/A                               |
| Thapsigargin                                                                                 | ThermoFisher Scientific                  | T7459                             |
| Ionomycin                                                                                    | ThermoFisher Scientific                  | I24222                            |
| Nigericin                                                                                    | Sigma-Aldrich                            | N7143                             |
| 2-APB                                                                                        | Tocris                                   | 524-95-8                          |
| (-)-Xestospongine C                                                                          | Tocris                                   | 88903-69-9                        |
| FURA-2 AM                                                                                    | ThermoFisher Scientific                  | F1221                             |
| Casein Blocking Buffer 10x                                                                   | Sigma-Aldrich                            | B6429                             |
| Puromycin dihydrochloride from <i>Streptomyces alboniger</i>                                 | Sigma-Aldrich                            | P7255                             |
| Minimal Essential Medium (MEM)                                                               | ThermoFisher Scientific                  | 31095-029                         |
| Dulbecco's Modified Eagle's Medium (DMEM)                                                    | ThermoFisher Scientific                  | 41966-029                         |
| RPMI 1640                                                                                    | ThermoFisher Scientific                  | 21875-034                         |
| G418                                                                                         | Sigma-Aldrich                            | G8168                             |
| Foetal bovine serum (FBS)                                                                    | ThermoFisher Scientific                  | 11573397                          |
| L-alanyl-L-Glutamine                                                                         | ThermoFisher Scientific                  | 35050-038                         |
| $\beta$ -Mercaptoethanol                                                                     | Carl Roth                                | 4227.3                            |
| Sodium-Pyruvate                                                                              | ThermoFisher Scientific                  | 11360-070                         |
| Amino Acid Mixture Minus Methionine                                                          | Promega                                  | L996A                             |
| Reticulocyte Lysate, Nuclease Treated                                                        | Promega                                  | L416A                             |
| EasyTag EXPRESS <sup>35</sup> S Protein Labeling Mix, [ <sup>35</sup> S]                     | PerkinElmer                              | NEG7720002MC                      |
| HiPerFect Transfection Reagent                                                               | Qiagen                                   | 301705                            |
| Guava ViaCount                                                                               | Merck                                    | 4000-0041                         |
| <b>Deposited Data</b>                                                                        |                                          |                                   |
| Human Sec61 subunit alpha, isoform 1                                                         | <a href="#">Dudek et al., 2015</a>       | UniProtKB: P61619                 |
| Canine Sec61 alpha 1 structure                                                               | <a href="#">Voorhees and Hegde, 2016</a> | PDB: 3JC2                         |
| Canine ribosome-bound Sec61 alpha 1 structure                                                | <a href="#">Pfeffer et al., 2015</a>     | PDB: 5A6U                         |

(Continued on next page)

**Continued**

| REAGENT or RESOURCE                                                                                                    | SOURCE                                      | IDENTIFIER                                                                                                                                                        |
|------------------------------------------------------------------------------------------------------------------------|---------------------------------------------|-------------------------------------------------------------------------------------------------------------------------------------------------------------------|
| Mouse P-glycoprotein structure                                                                                         | <a href="#">Aller et al., 2009</a>          | PDB: 3G5U                                                                                                                                                         |
| Human beta 2 adrenoreceptor structure                                                                                  | <a href="#">Rasmussen et al., 2011</a>      | PDB: 3P0G                                                                                                                                                         |
| Experimental Models: Cell Lines                                                                                        |                                             |                                                                                                                                                                   |
| HEK                                                                                                                    | ATCC                                        | CRL-1573                                                                                                                                                          |
| HEK-D1ER                                                                                                               | This study                                  | N/A                                                                                                                                                               |
| HeLa                                                                                                                   | ATCC                                        | CCL-2                                                                                                                                                             |
| INS-1                                                                                                                  | <a href="#">Asfari et al., 1992</a>         | N/A                                                                                                                                                               |
| NALM-6                                                                                                                 | DSMZ                                        | ACC-128                                                                                                                                                           |
| Oligonucleotides                                                                                                       |                                             |                                                                                                                                                                   |
| SEC61A1#4 siRNA: GGAAUUUGCCUGCUAAUCAtt                                                                                 | Qiagen                                      | N/A                                                                                                                                                               |
| SEC61A1#5 siRNA: CACUGAAAUGUCUACGUUUtt                                                                                 | Qiagen                                      | N/A                                                                                                                                                               |
| AllStars Negative Control siRNA                                                                                        | Qiagen                                      | 1027285                                                                                                                                                           |
| SERCA2 siRNA                                                                                                           | ThermoFisher Scientific                     | 120744                                                                                                                                                            |
| Silencer Negative Control                                                                                              | ThermoFisher Scientific                     | AM4611                                                                                                                                                            |
| Recombinant DNA                                                                                                        |                                             |                                                                                                                                                                   |
| pcDNA3-D1ER                                                                                                            | <a href="#">Palmer et al., 2004</a>         | Addgene: 36325                                                                                                                                                    |
| cDNA coding for residues 17 to 232 of the short form of human HLA class II histocompatibility antigen gamma chain (li) | <a href="#">Claesson et al., 1983</a>       | UniProtKB: P04232-2                                                                                                                                               |
| Software and Algorithms                                                                                                |                                             |                                                                                                                                                                   |
| Live Acquisition                                                                                                       | Till Photonics                              | <a href="https://www.fei.com/service-support/Light-Microscopy/">https://www.fei.com/service-support/Light-Microscopy/</a>                                         |
| AIDA v5.0                                                                                                              | Elysia Raytest                              | <a href="http://www.elysia-raytest.com/de/cataloglight/">http://www.elysia-raytest.com/de/cataloglight/</a>                                                       |
| Matlab R2015b                                                                                                          | Mathworks                                   | <a href="https://de.mathworks.com/products.html">https://de.mathworks.com/products.html</a>                                                                       |
| MODELLER 9.17                                                                                                          | <a href="#">Martí-Renom et al., 2000</a>    | <a href="https://salilab.org/modeller/download_installation.html">https://salilab.org/modeller/download_installation.html</a>                                     |
| NAMD                                                                                                                   | <a href="#">Phillips et al., 2005</a>       | <a href="http://www.ks.uiuc.edu/Development/Download/download.cgi?PackageName=NAMD">http://www.ks.uiuc.edu/Development/Download/download.cgi?PackageName=NAMD</a> |
| Pro-Sa-web                                                                                                             | <a href="#">Wiederstein and Sippl, 2007</a> | <a href="https://prosa.services.came.sbg.ac.at/prosa.php">https://prosa.services.came.sbg.ac.at/prosa.php</a>                                                     |
| AutoDock4                                                                                                              | <a href="#">Morris et al., 2009</a>         | <a href="http://autodock.scripps.edu/downloads">http://autodock.scripps.edu/downloads</a>                                                                         |

**CONTACT FOR REAGENT AND RESOURCES SHARING**

Further information and requests for resources and reagents should be directed to and will be fulfilled by the Lead Contact, Adolfo Cavalié ([Adolfo.cavalié@uks.eu](mailto:Adolfo.cavalié@uks.eu)).

**EXPERIMENTAL MODEL AND SUBJECT DETAILS**

HEK cells (human epithelial embryonic kidney cells, ATCC) were cultivated in Dulbecco's Modified Eagle's Medium (DMEM) supplemented with 10% (v/v) foetal bovine serum (FBS). In order to obtain cells with homogenous expression levels of the FRET-based Ca<sup>2+</sup>-sensor D1ER, we generated the stable cell line HEK D1ER by transfecting HEK cells with the plasmid pcDNA3-D1ER ([Palmer et al., 2004](#)), which was kindly provided R. Y. Tsien (University of California San Diego, La Jolla, USA). HEK-D1ER cells were maintained in culture under selection with G418 (0.5 mg/ml) in Minimal Essential Medium (MEM) supplemented with 10% (v/v) FBS. HeLa cells (human epithelial cervix carcinoma cells, ATCC, female) were cultured in DMEM supplemented with 10% (v/v) FBS and 2 mM L-alanyl-L-glutamine. NALM-6 (human B-cell precursor leukaemia cells, DSMZ, male) were cultured in RPMI 1640 medium supplemented with 10% (v/v) heat-inactivated FBS. INS-1 cells are derived from rat insulinoma ([Asfari et al., 1992](#)) and were



kindly provided by P. O. Berggren (Karolinska Institute, Stockholm, Sweden). The culture medium of INS-1 cells was RPMI 1640 supplemented with 10% (v/v) heat-inactivated FBS, 50  $\mu$ M  $\beta$ -mercaptoethanol and 1 mM Na-pyruvate. All cell lines were maintained in a 5% CO<sub>2</sub> humidified incubator at 37°C.

## METHOD DETAILS

### Synthesis of Eeyarestatin (ES) Compounds

The compounds ES1, ES2 and ESR35 were synthesized as previously described (McKibbin et al., 2012).

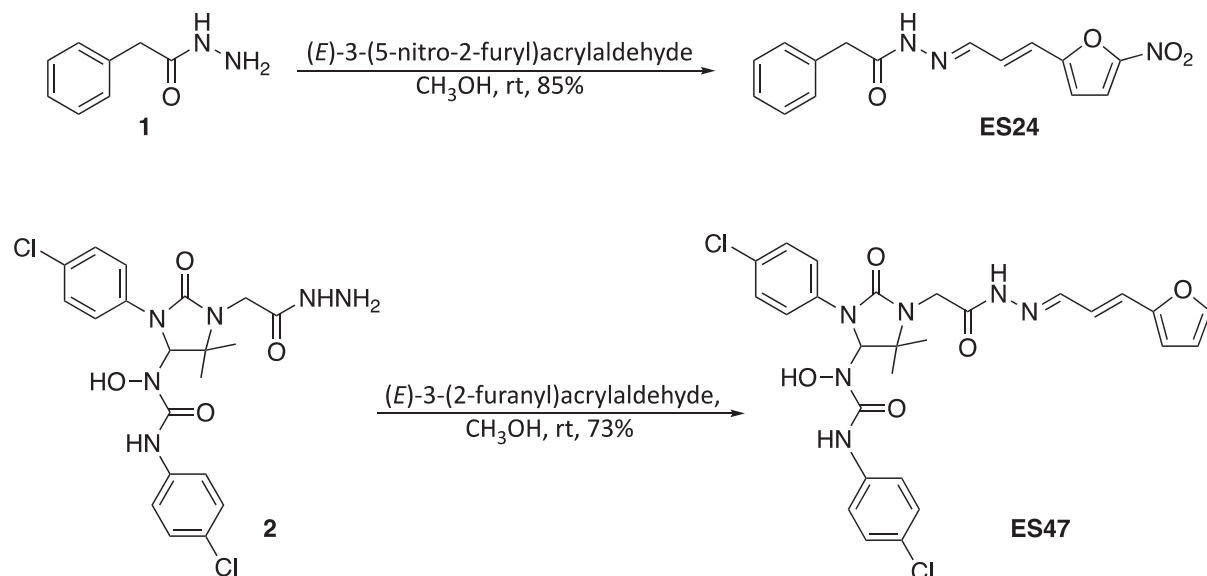

ES24 and ES47 were prepared in good yields by condensation of acyl hydrazides **1** and **2** with the appropriate conjugated aldehyde. Phenylacetic hydrazide **1** is commercially available and the synthesis of **2** (ESR35) has been reported previously (Cross et al., 2009a). The double bond geometry in both compounds was confirmed by the magnitude of the corresponding vicinal <sup>1</sup>H-<sup>1</sup>H coupling constant (15.9 Hz for ES24 and 14.8 Hz for ES47).

General experimental synthetic reagents and solvents were purchased from Sigma-Aldrich or Alfa Aesar and used as supplied. IR spectra were recorded on a Perkin Elmer 881 spectrometer, an AT1-Matson Genesis Series FTIR spectrometer or a Perkin Elmer Spectrum BX FTIR spectrometer. <sup>1</sup>H NMR spectra were recorded on a Bruker Avance II 500MHz spectrometer. Chemical shifts are referenced to the residual solvent peak. Mass spectra were recorded on a Micromass Platform II (electrospray) spectrometer. Melting points were recorded using a Sanyo Gallenkamp MPD350 heater and are uncorrected.

#### **2-[2-[3-(5-nitro-2-furyl)-2-propen-1-ylidene]hydrazino]-2-oxoethylbenzene (ES24)**

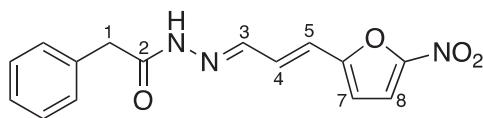

*(E)*-3-(5-Nitro-2-furyl)acrylaldehyde (128 mg, 0.77 mmol) was added, under nitrogen, to a solution of phenylacetic hydrazide (115 mg, 0.77 mmol) in anhydrous CH<sub>3</sub>OH (4 mL). The reaction mixture was stirred at room temperature overnight and then Et<sub>2</sub>O was added to allow complete precipitation to occur. The solid was collected by filtration and washed with Et<sub>2</sub>O and pentane, yielding the title compound (196 mg, 85%) as a yellow solid. Mp 202-204°C;  $\nu_{\max}$  (evaporated film)/cm<sup>-1</sup> 3137 (w, N-H), 3040 (w, C-H), 2971 (brw, C-H), 2857 (brw, C-H), 1747 (w, C=O), 1667 (s, C=C), 1587 (m, C=C), 1557 (m, C=C), 1504 (s, C=C); <sup>1</sup>H NMR (CDCl<sub>3</sub>; 500 MHz)  $\delta$  4.03 (2H, s, C(1)H<sub>2</sub>), 6.63 (1H, br, C(7)H), 6.65 (1H, d,  $J$  = 15.9 Hz, C(5)H), 7.15 (1H, dd,  $J$  = 15.9, 9.5 Hz, C(4)H), 7.33-7.37 (6H, m, C(8)H & Ar-CH), 7.51 (1H, d,  $J$  = 9.5 Hz, C(3)H);  $m/z$  (-ve ion electrospray) 298 ([M-H]<sup>-</sup>, 100%), (+ve ion electrospray) 322 ([M+Na]<sup>+</sup>, 100%); found 322.0805, C<sub>15</sub>H<sub>13</sub>N<sub>3</sub>O<sub>4</sub>Na ([M+Na]<sup>+</sup>), requires 322.0798.

***N'*-(4-Chlorophenyl)-*N*-[3-(4-chlorophenyl)-2-oxo-1-(2-{2-[3-(2-furyl)-2-propen-1-ylidene]hydrazino}-2-oxoethyl)-5,5-dimethyl-4-imidazolidinyl]-*N*-hydroxyurea (ES47)**

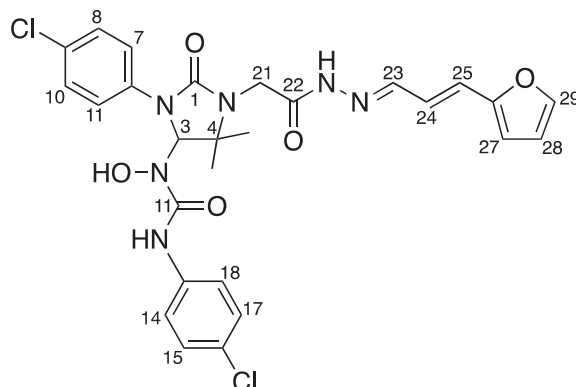

(*E*)-3-(2-Furyl)acrylaldehyde (49 mg, 0.4 mmol) was added, under nitrogen, to a solution of **2** (96 mg, 0.2 mmol) in anhydrous  $\text{CH}_3\text{OH}$  (1 mL). The reaction mixture was stirred at room temperature for 2 days and then concentrated under reduced pressure. The residue was recrystallised at room temperature from  $\text{Et}_2\text{O}$  /pentane, yielding the title compound (86 mg, 73%) as a pale yellow solid. Mp 213-214.5°C;  $\nu_{\text{max}}$  (solid state)/ $\text{cm}^{-1}$  3395 (w, O-H), 3222 (brw, N-H), 3145 (brw, N-H), 3132 (brw), 3039 (w, C-H), 2979 (w, C-H), 2974 (w, C-H), 2930 (w, C-H), 1699 (m, C=O), 1680 (s, C=O), 1661 (s, C=O), 1633 (m, C=C), 1588 (w, C=C), 1550 (s, C=C), 1512 (m, C=C);  $^1\text{H}$  NMR ( $\text{CDCl}_3$ ; 500 MHz)  $\delta$  1.31 (3H, s, C(19) $\text{H}_3$  or C(20) $\text{H}_3$ ), 1.40 (3H, s, C(19) $\text{H}_3$  or C(20) $\text{H}_3$ ), 4.41 (2H, ABq,  $J_{AB} = 18.7$  Hz, C(21) $\text{H}_2$ ), 5.75 (1H, d,  $J = 14.8$  Hz, C(25)H), 6.10 (1H, s, C(3)H), 6.29 (1H, d,  $J = 3.1$  Hz, C(27)H), 6.38 (1H, dd,  $J = 3.1, 1.7$  Hz, C(28)H), 6.59 (1H, dd,  $J = 14.8, 7.9$  Hz, C(24)H), 7.17 (4H, m, Ar-CH), 7.20-7.25 (1H, m, C(23)H), 7.40 (1H, br, C(29)H), 7.47 (4H, m, Ar-CH), 7.78 (1H, brs, NH or OH), 9.41 (1H, brs, NH or OH), 9.75 (1H, brs, NH or OH);  $m/z$  (–ve ion electrospray) 587 ( $[\text{M}-\text{H}]^-$ , ( $^{37}\text{Cl}, ^{37}\text{Cl}$ ), 10%), 585 ( $[\text{M}-\text{H}]^-$ , ( $^{35}\text{Cl}, ^{37}\text{Cl}$ ), 65%), 583 ( $[\text{M}-\text{H}]^-$ , ( $^{35}\text{Cl}, ^{35}\text{Cl}$ ), 100%); (+ve ion electrospray) 611 ( $[\text{M}+\text{Na}]^+$ , ( $^{37}\text{Cl}, ^{37}\text{Cl}$ ), 10%) 609 ( $[\text{M}+\text{Na}]^+$ , ( $^{35}\text{Cl}, ^{37}\text{Cl}$ ), 60%), 607 ( $[\text{M}+\text{Na}]^+$ , ( $^{35}\text{Cl}, ^{35}\text{Cl}$ ), 100%); (Found 607.1244,  $\text{C}_{27}\text{H}_{26}^{35}\text{Cl}_2\text{N}_6\text{NaO}_5$ , ( $[\text{M}+\text{Na}]^+$ ), requires 607.1234).

### **In Vitro Translocation Assay**

Nuclease-treated canine pancreatic microsomes were treated with 250  $\mu\text{M}$  ESR35, ES1, ES2, ES24, ES47 (from 1 mM stock solutions in DMSO), or an equal volume of DMSO, and incubated on ice for 1 h before inclusion in translocation analyses. Cell-free translation (20  $\mu\text{L}$ ) was performed in nuclease-treated rabbit reticulocyte lysate (Promega) in the presence of EasyTag EXPRESS  $^{35}\text{S}$  Protein Labelling Mix containing [ $^{35}\text{S}$ ] methionine (Perkin Elmer) (0.611 MBq; 40.95 TBq/mmol), ~2.5% (v/v) amino acids minus methionine (Promega), 9% (v/v) *in vitro* transcribed mRNA (290 ng/ $\mu\text{L}$  stock) encoding residues 17 to 322 of the short form of human HLA class II histocompatibility antigen gamma chain (li) and 10% (v/v) inhibitor/DMSO pre-treated rough microsomes for 20 min at 30°C. The short form of li was kindly provided by Dr. B. Dobberstein (ZMBH, Heidelberg University, Heidelberg, Germany). Following translation, puromycin was added to 0.1 mM and samples incubated for 5 min at 30°C to ensure ribosomal release. The membrane-associated fraction of the reaction was isolated by centrifugation (100,000  $g$  for 10 min at 4°C in a TLA100 rotor (Beckmann) through an 80  $\mu\text{L}$  high-salt cushion (0.75 M sucrose, 0.5 M KOAc, 5 mM  $\text{Mg}(\text{OAc})_2$ , 50 mM Hepes-KOH, pH 7.9) and the membrane pellet suspended in 30  $\mu\text{L}$  SDS sample buffer (0.02% bromophenol blue, 62.5 mM, 4% (w/v) SDS, 10% (v/v) glycerol; pH 7.6; 1 M dithiothreitol). Samples were denatured at 70°C for 5 min prior to resolution by SDS-PAGE (10  $\mu\text{L}$  sample, 16% polyacrylamide gels, 120 V, 120 min). Gels were incubated in fix mix (20% MeOH, 10% AcOH) for 5 min, dried (BioRad Gel Dryer) for 2 h at 65°C and exposed to a phosphore imaging plate for 24 h. Radiolabelled products were visualized using a Typhoon FLA-7000 (GE Healthcare). Quantitative analysis was performed with AIDA v5.0 (Raytest Isotopenmeßgeräte) whereby the signal intensity of li-2 Gly/li was used as a read-out for total translocation and expressed relative to the DMSO control to determine the mean relative ER processing from 3 independent experiments. Data is presented as mean  $\pm$  SEM.

### **In Cellula Ubiquitination Assay**

Experiments performed with HeLa cells cultured to ~80% confluent. DMEM was aspirated from each well 16 h after cell plating and cells treated with 8  $\mu\text{M}$  ES1, ES2, ES24, ESR35 and ES47 (from 10 mM stock solutions in DMSO), or an equal volume of DMSO, in 1 mL fresh DMEM for 8 h. Upon treatment completion, DMEM was aspirated, cells washed twice with PBS (Dulbecco's Phosphate Buffered Saline) and solubilized in 100  $\mu\text{L}$  SDS sample buffer. Samples were denatured for 16 h at 37°C, resolved by SDS-PAGE (20  $\mu\text{L}$  sample, 10% polyacrylamide gels, 120 V, 100 min) and proteins transferred to a PVDF membrane in transfer buffer (0.08 M Tris base, 0.60 M glycine, 20% MeOH) at 300 mA for 2.5 h at ambient temperature. The membrane was blocked in Casein blocking buffer (Sigma) diluted in TBS (Tris Buffered Saline; 0.2 M Tris base and 1.5 M NaCl; pH 7.4) for 1 h at ambient temperature prior to primary antibody (FK2 mouse (Enzo Life Sciences) and  $\beta$ -actin (Abcam)) incubation in Casein blocking buffer diluted 1:10 in TBST (TBS supplemented with 0.1% Tween-20) for 16 h at 4°C. After washing with TBST (4 x 10 min), the membrane was then incubated

with a fluorescent secondary antibody for 1 h at ambient temperature. Following washing with TBST (4 x 10 min), samples were visualized using an Odyssey CLx Imaging System (LICOR Biosciences). Ubiquitin signals were normalized relative to the intensity of the  $\beta$ -actin loading control and normalized signals expressed relative to the DMSO solvent control. Data is shown as mean  $\pm$  SEM from 6 independent experiments.

### Gene Silencing

Silencing of *SEC61A1* was performed in HeLa cells as previously described (Lang et al., 2011b). Briefly,  $5.2 \times 10^5$  HeLa cells were seeded per 6-cm culture plate transfected with *SEC61A1*#4 (GGAAUUUGCCUGCUAAUCAtt, Qiagen) or *SEC61A1*#5 siRNA (CACUGAAAUGUCUACGUUUtt, Qiagen) or scramble siRNA (AllStars Negative Control siRNA, Qiagen) using HiPerFect Reagent (Qiagen). After 24 h, cells were transfected for a second time.  $\text{Ca}^{2+}$  imaging experiments were performed 96 h after beginning of transfection. Silencing efficiencies were evaluated by Western blot analysis using the respective antibodies and an anti- $\beta$ -actin-antibody from mice (Schäuble et al., 2012). For silencing of *SERCA2*, HeLa cells were transfected with 30  $\mu\text{M}$  siRNA *SERCA2* (GCGGAUUAAAGCUAAAGACtt, Thermo Fisher) or with 30  $\mu\text{M}$  *scr RNA* (Silencer Negative Control, Thermo Fisher) using HiPerFect (Qiagen).  $\text{Ca}^{2+}$  imaging experiments were performed 24 h after transfection. *SERCA2* expression levels were detected with a *SERCA2* antibody (S1439, Thermo Fisher).

### Live Cell Calcium Imaging

$[\text{Ca}^{2+}]_{\text{ER}}$  and  $[\text{Ca}^{2+}]_{\text{cyt}}$  were imaged using D1ER and FURA-2, respectively. D1ER is a genetically encoded FRET-based  $\text{Ca}^{2+}$  sensor that comprises two fluorescent proteins, CFP and citrine, and two sensing proteins, a calmodulin-binding peptide derived from skeletal muscle myosin light chain kinase and calmodulin (Palmer et al., 2004). D1ER was stably expressed in HEK cells. FURA-2 is a ratiometric dye that localizes to the cytosol (see Lang et al., 2011b). For simultaneous measurements of  $[\text{Ca}^{2+}]_{\text{ER}}$  and  $[\text{Ca}^{2+}]_{\text{cyt}}$ , HEK-D1ER cells were loaded with the membrane-permeable FURA-2 AM just before each  $\text{Ca}^{2+}$  imaging experiment (see Lang et al., 2011b). In order to prevent the  $\text{Ca}^{2+}$  entry from the extracellular space, all  $\text{Ca}^{2+}$  imaging experiments were carried out with a  $\text{Ca}^{2+}$ -free bath solution (140mM NaCl, 5mM KCl, 1mM  $\text{MgCl}_2$ , 0.5 mM EGTA, 10 mM glucose in 10 mM HEPES-KOH, pH 7.35). Accordingly, D1ER and FURA-2 reported changes in  $[\text{Ca}^{2+}]_{\text{ER}}$  and  $[\text{Ca}^{2+}]_{\text{cyt}}$ , respectively, which arose from  $\text{Ca}^{2+}$  mobilisation within internal cell compartments.  $\text{Ca}^{2+}$  imaging experiments were performed with cells that were plated on poly-L-lysine-coated cover slips and cultured for 48-72 h.

$\text{Ca}^{2+}$  imaging experiments were carried out with the iMIC microscope, the polychromator V, and the Live Acquisition software (Till Photonics). To allow the recording of D1ER and FURA-2 signals in the same cells, the filter sets were automatically exchanged. Firstly, D1ER was excited by exposing HEK D1ER cells at 433 nm. The emitted fluorescence was then split at 469/23 nm and 536/27 nm to obtain the CFP and citrine components, respectively. The cell fluorescence was additionally passed through a dichrotome and projected on the chip of the microscope camera to obtain simultaneous CFP and citrine images. Secondly, FURA-2 was excited by alternated excitation at 340 and 380nm. The emitted fluorescence also passed through a dichrotome and captured at 510 nm to obtain FURA-2 images at 340 and 380 nm excitation. D1ER and FURA-2 image pairs containing 5–10 cells/frame were obtained every 10-12 s. D1ER ratios were calculated from CFP and citrine image pairs as F536/F469, where F536 and F469 represent the background-subtracted citrine and CFP fluorescence intensities, respectively. FURA-2 signals were measured in FURA-2 image pairs as F340/F380, where F340 and F380 correspond to the background-subtracted fluorescence intensity at 340 and 380 nm excitation wavelengths, respectively. Following corrections for bleed-through, F536/F469 and F340/F380 were used to calculate  $[\text{Ca}^{2+}]_{\text{ER}}$  and  $[\text{Ca}^{2+}]_{\text{cyt}}$ , respectively (see Sztretye et al., 2011; Lang et al., 2011b). Basically, free  $\text{Ca}^{2+}$  concentrations were calculated with the standard ratiometric equation  $[\text{Ca}^{2+}]_{\text{free}} = \beta K_d \cdot ((R - R_{\text{min}})/(R_{\text{max}} - R))$  (see Lang et al., 2011b), in which we replaced R by the ratios F536/F469 and F340/F380 to obtain  $[\text{Ca}^{2+}]_{\text{ER}}$  and  $[\text{Ca}^{2+}]_{\text{cyt}}$ , respectively. In this equation, the apparent  $K_d$  of the  $\text{Ca}^{2+}$  sensors is represented by  $\beta K_d$  and was obtained by measuring F536/F469 ratios in HEK-D1ER cells that were exposed to 10  $\mu\text{M}$  ionomycin, 10  $\mu\text{M}$  nigericin and free  $\text{Ca}^{2+}$  concentrations between 1  $\mu\text{M}$  and 10 mM. Fitting of the calibration data with the standard ratiometric equation reveal a  $\beta K_d$  of 165.25  $\mu\text{M}$  for D1ER in our imaging system.  $\beta K_d$  was 5.26  $\mu\text{M}$  for FURA-2 in our imaging system. Maximal and minimal fluorescence ratios of the  $\text{Ca}^{2+}$  sensors are given by  $R_{\text{min}}$  and  $R_{\text{max}}$  in the standard ratiometric equation, respectively, HEK-D1ER cells were exposed to 10  $\mu\text{M}$  ionomycin and the  $R_{\text{max}}$  of D1ER signals was measured as the maximal F536/F469 ratio in the presence of 25 mM  $\text{Ca}^{2+}$ . Conversely, the  $R_{\text{min}}$  of D1ER signals was the minimal F536/F469 ratio measured in the presence of 0.5 mM EGTA. The  $R_{\text{max}}$  and  $R_{\text{min}}$  of FURA-2 signals were determined in FURA-2 loaded HEK-D1ER cells as previously described (see Lang et al., 2011b). HeLa cells were used to image only cytosolic  $\text{Ca}^{2+}$  in gene silencing experiments and, accordingly,  $[\text{Ca}^{2+}]_{\text{cyt}}$  was imaged with FURA-2 as previously described (see Lang et al., 2011b).

Stock solution of ES compounds were prepared by dissolving the compounds ES1, ES2, ES24, ESR35 and ES457 in DMSO to obtain concentrations of 10-100 mM. Stock were maintained frozen at  $-20^\circ\text{C}$ . Similarly, 1 mM stocks of thapsigargin were prepared in DMSO. Just before experiments, stocks of TG and ES compounds were diluted to a 2X concentration in the bath solution, i.e., 2 times greater than the desired final concentration. Routinely, TG and ES compounds were applied to the cells during  $\text{Ca}^{2+}$  imaging by adding 2X solutions to the bath at a ratio of 1:1 to avoid problems arising from slow mixing. The final DMSO concentration in bath was 0.01-0.05 % v/v. During  $\text{Ca}^{2+}$  imaging, a base line was routinely recorded before applying ES compounds in order to determine the status of  $[\text{Ca}^{2+}]_{\text{cyt}}$  and  $[\text{Ca}^{2+}]_{\text{ER}}$ . In the so-called “online” protocol, ES compounds were applied at 3 min while imaging was running. Mock treatment represents the application of 0.01–0.05% v/v DMSO in bath solution. Following 1, 4 and 17 min exposures to eeyarestatin compounds, TG was applied in bath to unmask the  $\text{Ca}^{2+}$  leakage from ER. In experiments with D1ER and FURA-2,

5–10 HEK D1ER cells were imaged simultaneously, while 30–50 HeLa cells were imaged per experiment with FURA-2. Time courses of  $[Ca^{2+}]_{ER}$  and/or  $[Ca^{2+}]_{cyt}$  were constructed for each experiment and parameters such as the area under the curve and amplitude of TG responses were measured for each single cell.  $Ca^{2+}$  imaging experiments were performed with 3–5 different batches of HeLa and HEK D1ER cells. Data has been collected in 6–12 independently experiments repeated for each experimental setting and is shown as mean  $\pm$  SEM.

### Cell Viability Assay

HEK, HeLa, INS-1 and NALM-6 cells were plated in culture dishes at densities between  $0.25\text{--}0.50 \cdot 10^6$  cells/ml in the respective culture medium and treated with ES1, ES24 and ESR35 at concentrations between 1–20  $\mu\text{M}$  for 24 h. Similarly, cells were treated with 1  $\mu\text{M}$  thapsigargin for 24 h. The DMSO concentration was 0.1 % in TG-containing medium and below 0.02 % in medium with ES compounds. Following treatment, cells were incubated with PBS and Guava ViaCount reagent (1:10) for 5 min in the dark at room temperature. Cell viability was measured by flow cytometry with Guava easyCyte 8HT (Merck Millipore). Viability measurements were performed as duplicates in 3 independent experiments per treatment with 5000 cells/measurement. The cell viability of cells exposed to ES1, ES24 and ESR35 was normalised with respect to the viability of non-treated cells. For cells exposed to TG, cell viability was normalised to 0.1 % DMSO controls. Normalised viability data is presented as mean  $\pm$  SD.

### Homology Modelling and Docking Protocols

The protein sequence of human Sec61 $\alpha$  isoform 1, which contains 476 amino acids, was retrieved from the UniProtKB database (UniProt: P61619). The crystal structure of canine Sec61 $\alpha$  (PDB: 3JC2) was selected for homology modelling of human Sec61 $\alpha$ . Both sequences share 99.8% sequence identity. The 3JC2 structure shows Sec61 $\alpha$  in an open conformation but is lacking structural information for the helical plug region (residue 63 to 69). Since in the open conformation, the plug is believed to be outside of the translocation pathway, we assumed that it does not form relevant interaction with the substrates. Homology modelling was carried out using the MODELLER 9.17 package. The plug region was modelled and optimised as a loop structure. Subsequently, the homology model was subjected to energy minimization, using the NAMD package, to relax side chain atoms. The resulting model (Figure 6A) was validated by the ProSa-web server, along with two Sec61 $\alpha$  structures (PDB: 3JC2 and PDB: 5A6U) and two other membrane protein structures: a GPCR (PCB: 3P0G) and an ABC transporter (PDB: 3G5U). The analysis from ProSa-web showed that the score of the homology model is within the range of scores typically found in experimentally determined structures of protein chains. The structural model of Sec61  $\alpha$  carrying the T86M mutation was generated by Swiss-Pdb Viewer and subsequent minimization with NAMD.

The protonation states of protein residues and partial charges of ligands were assigned by the *prepare\_receptor* and *prepare\_ligand* modules of the AutoDock4 package. For each ligand, the docking calculations were performed in 2 consecutive steps: In the first docking step, we adopted a relatively large grid box covering the entire cavity of Sec61, to scan for energetically favourable conformations of the ligand inside the Sec61 pocket. The Lamarckian genetic algorithm was used for the optimization of the ligand conformations and orientations (cubic box of 45 Å, grid spacing,  $2.5 \times 10^6$  energy evaluations and  $27 \times 10^3$  generations). In the second docking step, the size of the grid box was scaled down based on the population of the most stable binding positions of the ligand. In a finer run, more stringent parameters (cubic box of 34 Å,  $100 \times 10^6$  energy evaluations and  $0.5 \times 10^6$  generations) were used.

### QUANTIFICATION AND STATISTICAL ANALYSIS

Quantification procedures used *in vitro* and *in cellula* experiments as well as in  $Ca^{2+}$  imaging experiments are described in [Method Details](#).

The statistical significance of *in vitro* and *in cellula* data with respect to DMSO controls was determined using Tukey's and Dunnett's multiple comparison tests, respectively. Statistical significance of the  $Ca^{2+}$  imaging data was assessed with the two-sample Kolmogorov-Smirnov test. Statistical significance is given as n.s., non-significant; \*,  $P < 0.05$ ; \*\*,  $P < 0.01$  and \*\*\*,  $P < 0.001$ .

### DATA AND SOFTWARE AVAILABILITY

*In vitro* data was analysed with AIDA. Matlab was used in the analysis of  $Ca^{2+}$  imaging data. Homology modelling and docking analysis were performed with Modeller 9.17, NAMD, Pro-Sa-web and AutoDock4.

**Cell Chemical Biology, Volume 26**

**Supplemental Information**

**Eeyarestatin Compounds Selectively Enhance**

**Sec61-Mediated Ca<sup>2+</sup> Leakage**

**from the Endoplasmic Reticulum**

**Igor Gamayun, Sarah O'Keefe, Tillman Pick, Marie-Christine Klein, Duy Nguyen, Craig McKibbin, Michela Piacenti, Helen M. Williams, Sabine L. Flitsch, Roger C. Whitehead, Eileithya Swanton, Volkhard Helms, Stephen High, Richard Zimmermann, and Adolfo Cavalé**

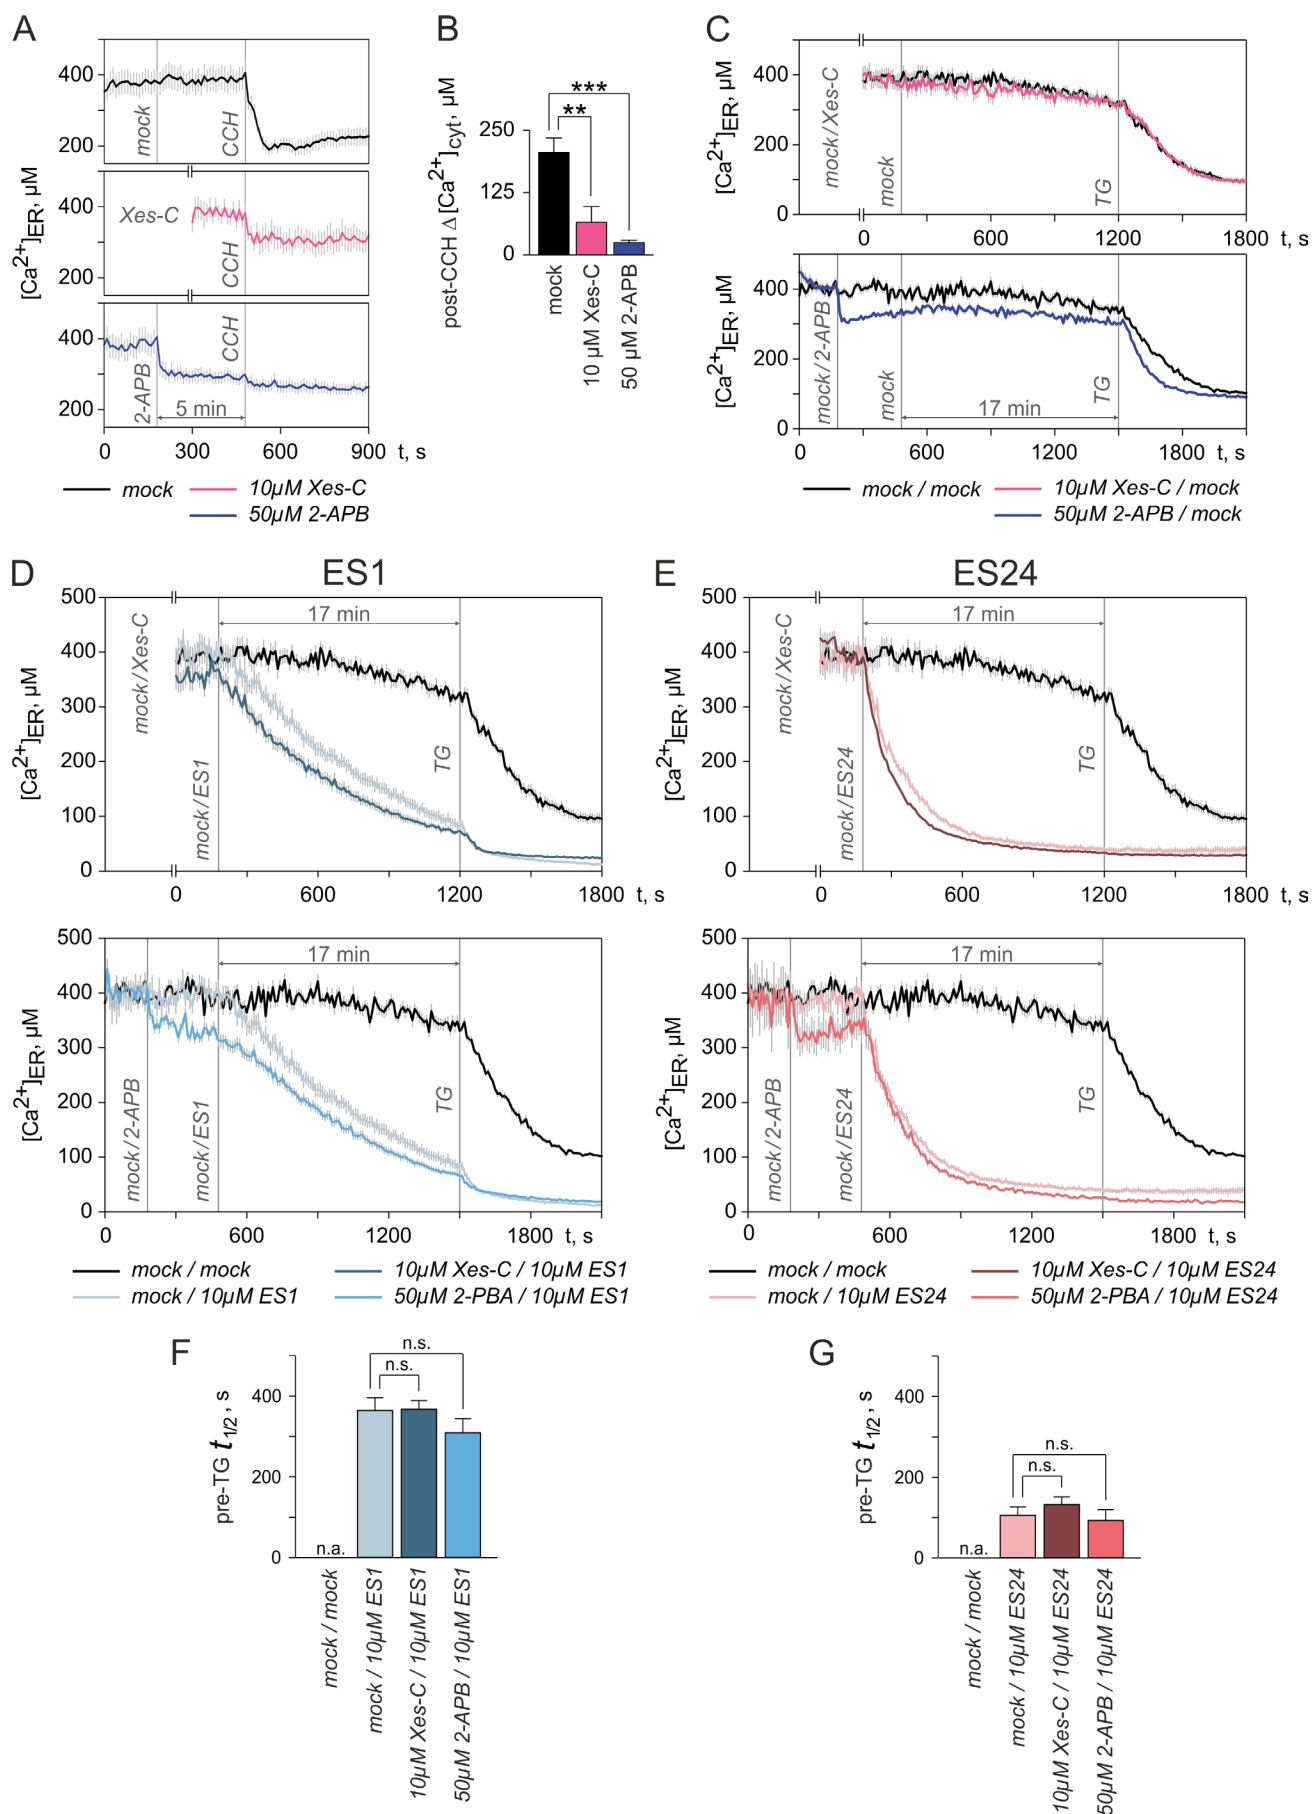

**FIGURE S1 (related to Fig. 1)**

**FIGURE S1 (related to Fig. 1).** Effects of ES1 and ES24 on the  $\text{Ca}^{2+}$  homeostasis under inhibition of  $\text{IP}_3$  receptors.

**(A)** Assessing the inhibition of  $\text{IP}_3$  receptors with 2-aminoethoxydiphenyl borate (2-APB) and xestospongine C (Xes-C) in HEK D1ER cells. The  $\text{Ca}^{2+}$  concentration in ER ( $[\text{Ca}^{2+}]_{\text{ER}}$ ) was measured in the absence of extracellular  $\text{Ca}^{2+}$  (see Methods) and the functionality of the  $\text{IP}_3$  signalling pathway was assessed by applying 1 mM carbachol (CCH). In mock-treated cells, CCH induced a drop in ER  $\text{Ca}^{2+}$ , indicating that the  $\text{IP}_3$  signalling pathway is active in HEK D1ER cells (upper panel). The ER  $\text{Ca}^{2+}$  drop induced by CCH was strongly reduced in cells pre-treated with 10  $\mu\text{M}$  Xes-C for 20 min (middle panel) and almost abolished after exposure to 50  $\mu\text{M}$  2-APB (lower panel).

**(B)** The quantification of decreases in  $[\text{Ca}^{2+}]_{\text{ER}}$  induced by CCH (post-CCH  $\Delta[\text{Ca}^{2+}]_{\text{ER}}$ ) indicates that 50  $\mu\text{M}$  2-APB inhibits  $\text{IP}_3$  receptors stronger than 10  $\mu\text{M}$  Xes-C in HEK D1ER cells.

**(C)** As a control, the protocol used in the experiments shown in Fig. 1B and Fig. 2C was tested in cells treated with Xes-C (10  $\mu\text{M}$  Xes-C / mock) and 2-APB (50  $\mu\text{M}$  2-APB / mock). The time courses of  $[\text{Ca}^{2+}]_{\text{ER}}$  in non-treated cells (mock / mock) and in cells treated with Xes-C were similar (upper panel). Although 2-APB induced a drop in ER  $\text{Ca}^{2+}$ ,  $[\text{Ca}^{2+}]_{\text{ER}}$  remained constant during the recordings (lower panel). As in Fig. 1B and 2C, 1  $\mu\text{M}$  thapsigargin (TG) was applied at the end of recordings.

**(D – E)** Effects of 10  $\mu\text{M}$  ES1 and 10  $\mu\text{M}$  ES24 on  $[\text{Ca}^{2+}]_{\text{ER}}$  under inhibition of  $\text{IP}_3$  receptors with Xes-C and 2-APB. HEK D1ER cells were pre-treated with 10  $\mu\text{M}$  Xes-C for 20 min and, subsequently, ES1 and ES24 were applied (*upper panels*, 10  $\mu\text{M}$  Xes-C / 10  $\mu\text{M}$  ES1, 10  $\mu\text{M}$  Xes-C / 10  $\mu\text{M}$  ES24). The exposure to 2-APB was 5 min long and followed by application of ES1 and ES24 (*lower panels*, 50  $\mu\text{M}$  2-APB / 10  $\mu\text{M}$  ES1, 50  $\mu\text{M}$  2-APB / 10  $\mu\text{M}$  ES24). For comparison, time courses of  $[\text{Ca}^{2+}]_{\text{ER}}$  in control experiments (mock / mock) and the effects of ES1 and ES24 on naïve cells (mock / 10  $\mu\text{M}$  ES1; mock / 10  $\mu\text{M}$  ES24) are shown.

**(F – G)** Comparison of half-times of the  $[\text{Ca}^{2+}]_{\text{ER}}$  decay induced by ES1 and ES24 before TG application (pre-TG  $t_{1/2}$ ) in the experiments shown in D-E.

DMSO controls are denoted as mock. Application time points are indicated by vertical lines in A and C-G. Data is presented as mean  $\pm$  SEM. n.a., not analysed; n.s., non-significant.

\*\* $\text{, } P < 0.01$ ; \*\*\* $\text{, } P < 0.001$ . N: 9-15 cells per experimental setting.

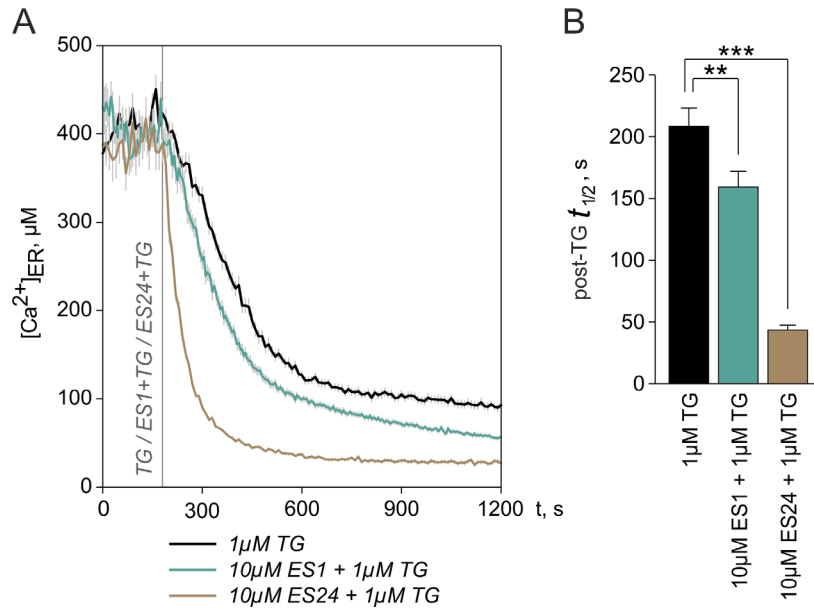

**FIGURE S2 (related to Fig. 2).** ES1 and ES24 accelerate the ER  $Ca^{2+}$  depletion induced by inhibition of SERCA pumps with thapsigargin.

**(A)** The  $Ca^{2+}$  concentration in ER ( $[Ca^{2+}]_{ER}$ ) was measured in HEK D1ER cells in the absence of extracellular  $Ca^{2+}$  (see Methods) and 1  $\mu M$  thapsigargin was applied either alone (TG) or in combination with 10  $\mu M$  ES1 (TG+ES1) and 10  $\mu M$  ES24 (TG+ES24) as indicated. **(B)** Comparison of the half times of decay in  $[Ca^{2+}]_{ER}$  (post-TG  $t_{1/2}$ ) induced by the application of TG, TG+ES1 and TG+ES24 in the experiments shown in A. Data is presented as mean  $\pm$  SEM. \*\*,  $P < 0.01$ ; \*\*\*,  $P < 0.001$ . N: 10-13 cells per experimental setting.



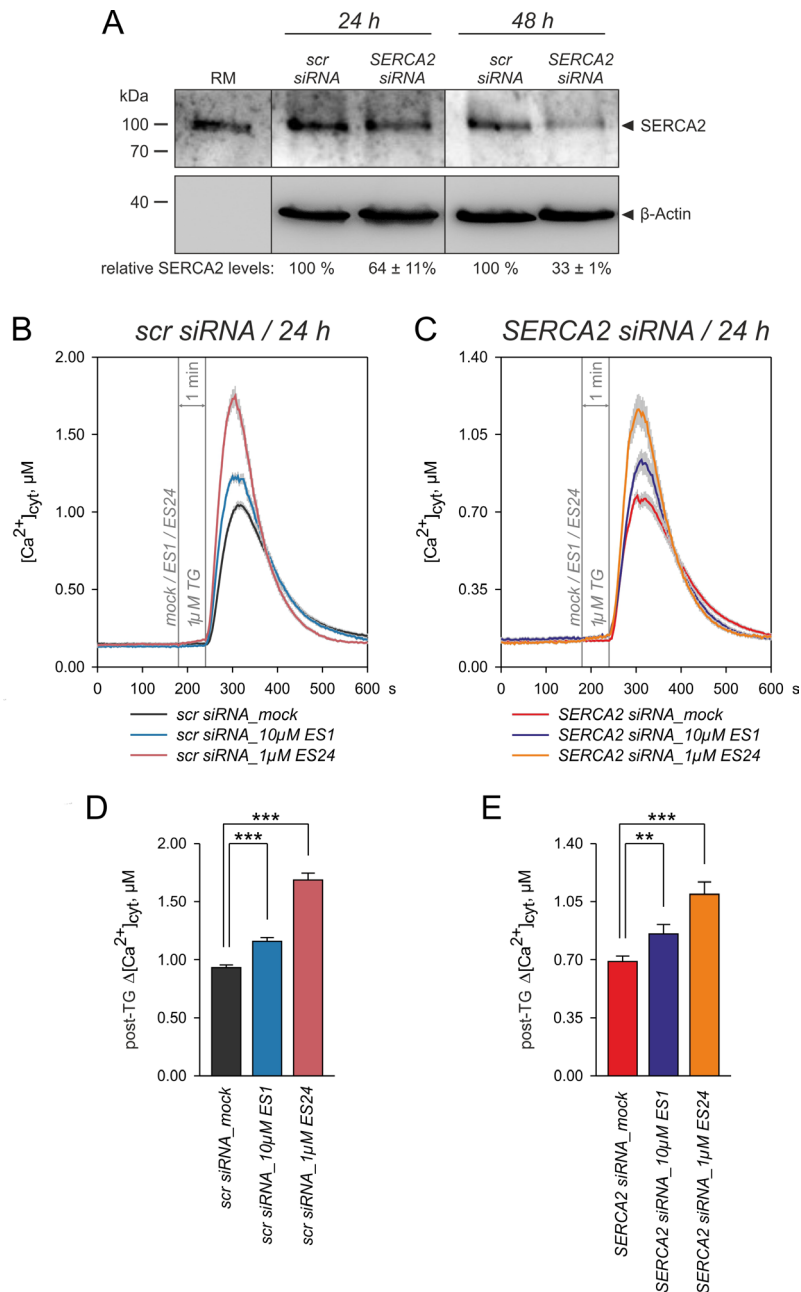

**FIGURE S3 (related to Fig. 3).** Effects of ES1 and ES24 in HeLa cells after knockdown of SERCA pumps.

**(A)** Expression of *SERCA2* in HeLa cells transfected with scramble siRNA (*scr siRNA*) or with siRNA targeting *SERCA2* (*SERCA2 siRNA*). *SERCA2* protein levels were normalized to  $\beta$ -actin and expressed relative to levels in cells transfected with *scr siRNA*. RM, pancreatic rough microsome. Relative *SERCA2* protein levels are given below Western blots.

**(B – C)** Effects of 10  $\mu M$  ES1 and 1  $\mu M$  ES24 on HeLa cells transfected with *scr siRNA* or *siRNA SERCA2*, as indicated above graphs.

**(D – E)** Quantification of TG responses (post-TG  $\Delta[Ca^{2+}]_{cyt}$ ) measured in experiments shown in B-C.

DMSO controls are denoted as mock. Application time points of ES1, ES24 and TG are indicated by vertical lines in B-C. Data is presented as mean  $\pm$  SD in A and as mean  $\pm$  SEM in B-E. N: 3 blots (A) and 48-63 cells per experimental setting (B-H). \*\*,  $P < 0.01$  and \*\*\*,  $P < 0.001$ .

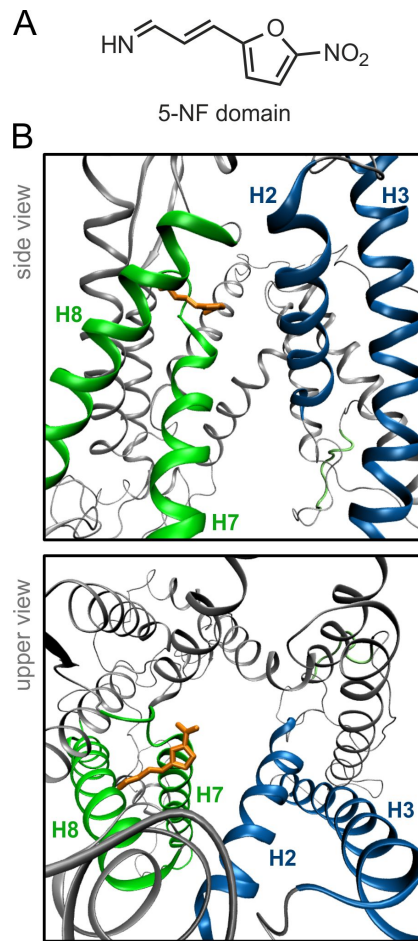

**FIGURE S4 (related to Fig. 6).** Docking of the 5-nitrofuran (5-NF) domain to Sec61 $\alpha$ .

**(A)** Chemical structure of the 5-NF domain.

**(B)** Docking of the pure 5-NF domain was analysed using the homology model of human Sec61 $\alpha$ . Shown is the docking position of the 5-NF domain (orange) with best docking score ( $\Delta G = -5.69$  kcal/mol). While this is lower than the docking scores of ES1 and ES24, it is typical that larger molecules achieve larger docking scores. The distance of 5-NF to the H2-H7 gap is 8.65 Å and, thus, slightly shorter than for ES1 (9.98 Å, see Fig. 6) and ES24 (9.87 Å, see Fig. 6). Images show the Sec61 $\alpha$  model seen from the plane of the membrane with the cytosolic side upwards (upper panel) and from the cytosol (lower panel). Lateral gate helices are highlighted in colours (H2 and H3, blue; H7 and H8, green).

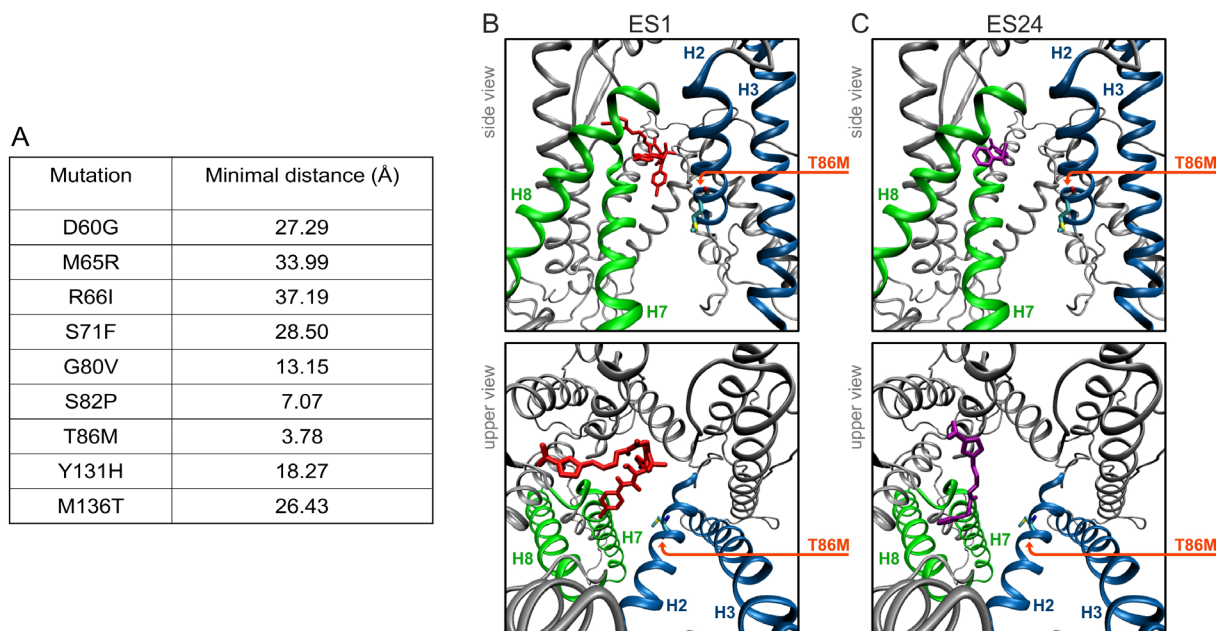

**FIGURE S5 (related to Figure 6).** Docking positions of ES1 and ES24 in the homology model of the human Sec61 $\alpha$  with the mutation T86M.

**(A)** Previously described Sec61 $\alpha$  mutations that confer resistance to various translocation inhibitors (Van Puyenbroeck and Vermiere, 2018) were incorporated in the homology model and minimal distances between mutated amino acids (C-alpha atom positions) and the H2-H7 gap of the lateral gate were measured. Among all these mutants, T86M is closest to the lateral gate. Hence, the mutation T86M was incorporated in the homology Sec61 $\alpha$  model and docking of ES1 and ES24 to the structural model of this mutant was performed.

**(B – C)** Best-scored docking positions of ES1 and ES24 in the model of the T86M Sec61 $\alpha$  mutant. The positions of ES1 and ES24 in the T86M Sec61 $\alpha$  mutant are very similar to the respective docking positions in the model of native Sec61 $\alpha$  (see Fig. 6). The docking scores of ES1 and ES24 in the T86M mutant were slightly lower (ES1,  $\Delta G = -9.39$  kcal/mol; ES24,  $\Delta G = -8.57$  kcal/mol) than in the native Sec61 $\alpha$  (ES1,  $\Delta G = -9.62$  kcal/mol; ES24,  $\Delta G = -9.04$  kcal/mol; see Fig. 6). Images show side views (upper panels) and upper views (lower panels) of the Sec61 $\alpha$  model seen from the plane of the membrane with the cytosolic side upwards and from the cytosol, respectively. The position of T86M is indicated in orange. Lateral gate helices are highlighted in colours (H2 and H3, blue; H7 and H8, green).
